# Supplementary material
Source: PubMed Central journal article supplement (PMC3856222)
Supplement: NIHMS516508-supplement-1_si_001.pdf [file NIHMS516508-supplement-1_si_001.pdf]

## Supporting Information

### A High-resolution MS, MS/MS, and UV Database of Fungal Secondary Metabolites as a Dereplication Protocol for Bioactive Natural Products

Tamam El-Elimat, Mario Figueroa, Brandie M. Ehrmann, Nadja B. Cech, Cedric J. Pearce, and Nicholas H. Oberlies

**Figure S1.** (+)-ESI TIC and SIC ( $m/z$ : 355, 508, 631, 325, 519, 1978, 654, 374, 357, and 429) of a mixture of ten standard compounds

**Figure S2.** Structures of the ten compounds analyzed in figure S1

**Table S1.** Chemical structures, chemical formulas, retention times, UV absorption maxima, (+)/(-)-ESI HRMS, and (+)/(-)-ESI CID MS/MS of 172 fungal secondary metabolites

RT: 0.00 - 9.99

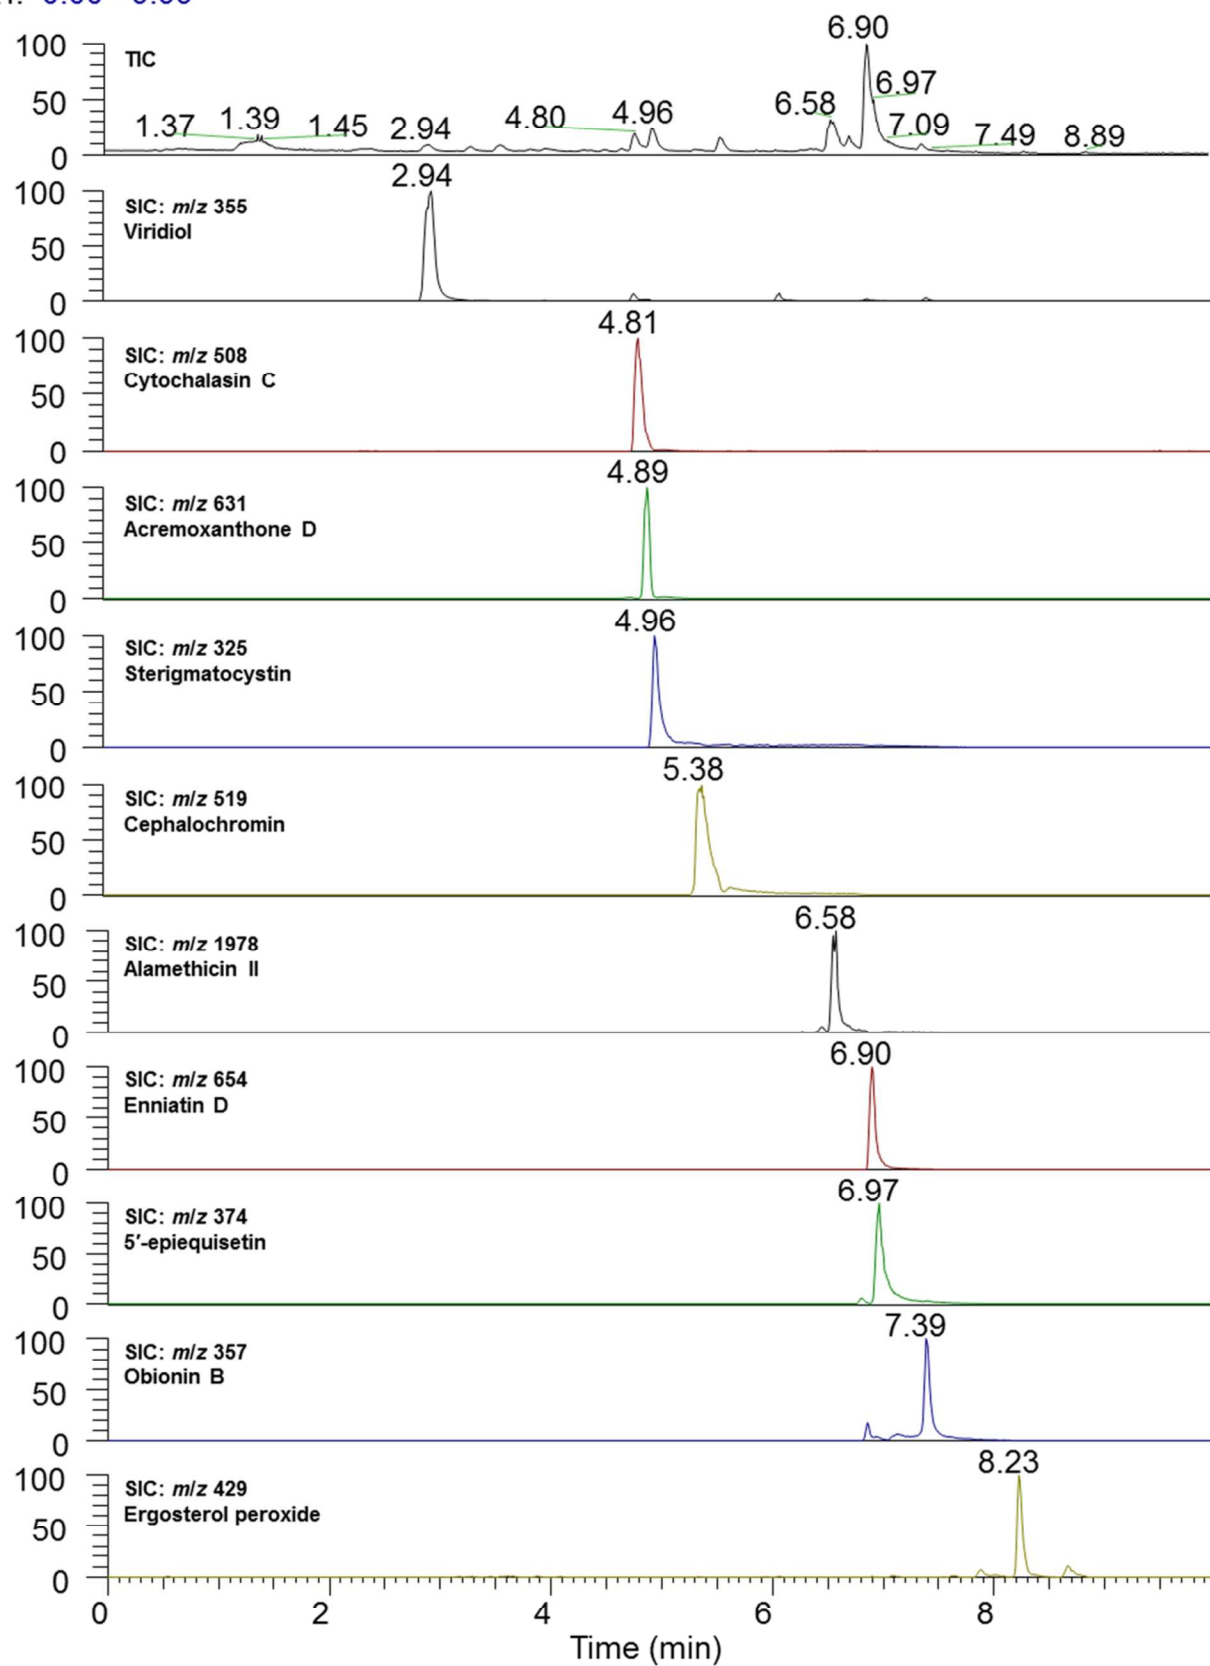

**Figure S1.** (+)-ESI TIC and SIC ( $m/z$ : 355, 508, 631, 325, 519, 1978, 654, 374, 357, and 429) of a mixture of ten standard compounds

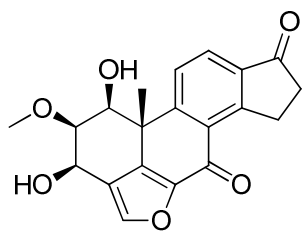

Viridiol

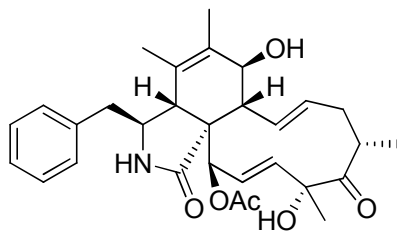

Cytochalasin C

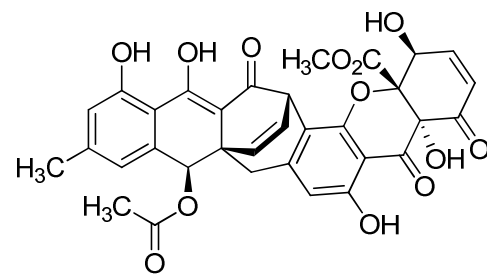

Acremoxanthone D

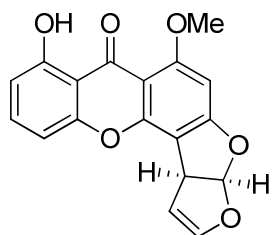

Sterigmatocystin

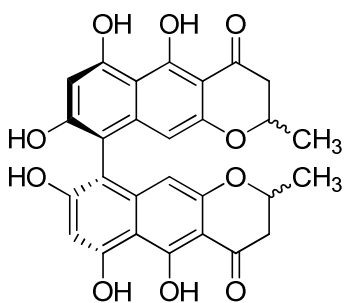

Cephalochromin

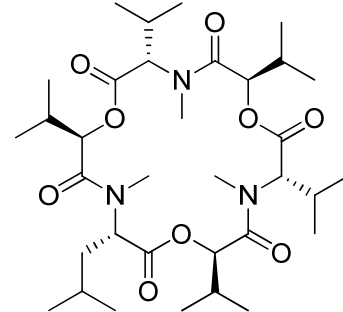

Enniatin D

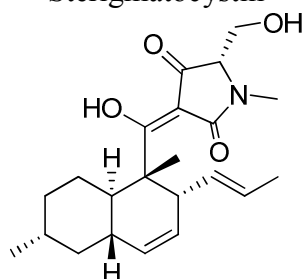

5'-epiequisetin

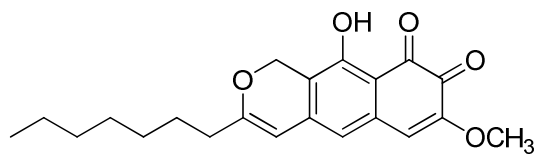

Obionin B

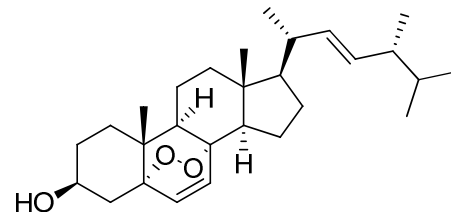

Erogerol peroxide

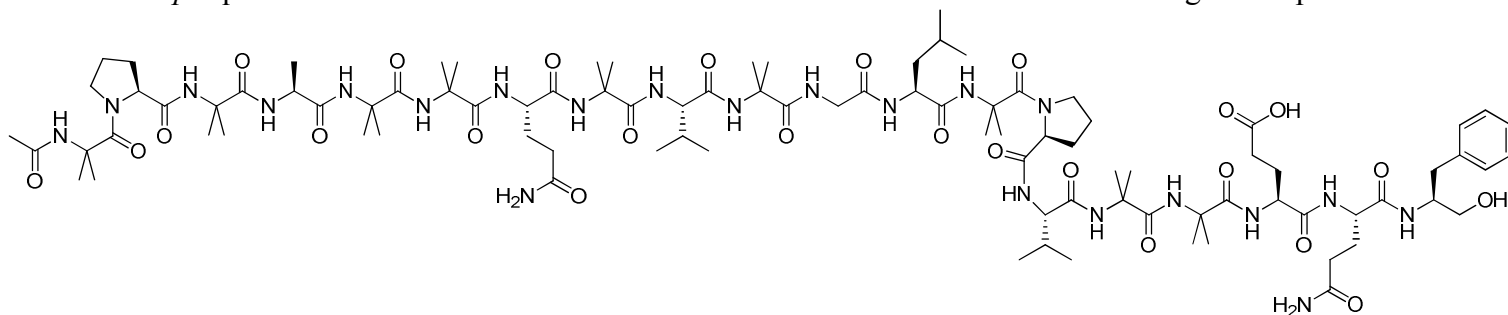

Alamethicin II

**Figure S2.** Structures of the ten compounds analyzed in figure S1

**Table S1.** Chemical structures, chemical formulas, retention times, UV absorption maxima, (+)/(-)-ESI HRMS, and (+)/(-)-ESI CID MS/MS of 172 fungal secondary metabolites

| #  | Chemical Structure and Chemical formula                                                                                                                         | Rt (min) | UV (nm)                     | Positive Ionization Mode |                                                                                        | Negative Ionization Mode |                                                                                        |
|----|-----------------------------------------------------------------------------------------------------------------------------------------------------------------|----------|-----------------------------|--------------------------|----------------------------------------------------------------------------------------|--------------------------|----------------------------------------------------------------------------------------|
|    |                                                                                                                                                                 |          |                             | [M+H] <sup>+</sup>       | MS/MS                                                                                  | [M-H] <sup>-</sup>       | MS/MS                                                                                  |
| 1. | 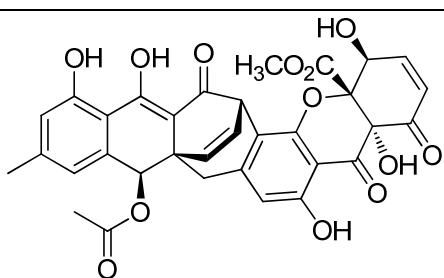 <p><b>Acremoxanthone D</b><br/>C<sub>33</sub>H<sub>26</sub>O<sub>13</sub></p> | 4.91     | 228,<br>278,<br>289<br>363  | 631.14288<br>(-2.8)      | 543.18, 571.13<br>554.20, 525.21<br>553.16, 497.21<br>493.12, 509.20<br>477.12, 387.19 | 629.12921<br>(-1.4)      | 567.16, 507.17<br>445.15, 569.13<br>385.15, 492.13<br>493.18, 357.10<br>611.20, 463.10 |
| 2. |  <p><b>Trichodermin</b><br/>C<sub>17</sub>H<sub>24</sub>O<sub>4</sub></p>      | 4.57     | 213                         | 293.17474<br>(0.0)       | 233.13, 215.12<br>187.04, 168.96<br>108.91, 275.05<br>197.08, 124.98<br>189.12, 205.09 | ND                       | ND                                                                                     |
| 3. |  <p><b>Harzianum A</b><br/>C<sub>23</sub>H<sub>28</sub>O<sub>6</sub></p>      | 4.25     | 306                         | 401.19519<br>(-1.7)      | 215.18, 233.16<br>383.14, 187.06<br>151.00, 159.11<br>197.12, 132.97<br>145.06, 171.10 | 399.18127<br>(-0.1)      | 231.07, 248.76<br>213.25, 149.07<br>123.73, 337.35<br>249.58, 265.41<br>194.85, 369.14 |
| 4. |  <p><b>Acremonidin C</b><br/>C<sub>33</sub>H<sub>26</sub>O<sub>13</sub></p>  | 5.20     | 226,<br>280,<br>345,<br>434 | 631.14264<br>(-3.1)      | 547.16, 459.14<br>487.15, 571.19<br>543.14, 447.17<br>387.13, 359.16<br>599.16, 553.21 | 629.12860<br>(-2.3)      | 597.18, 461.16<br>401.09, 383.09<br>357.18, 435.23<br>373.17, 553.26<br>493.17, 331.16 |

|    |                                                                                                                                                                                         |      |             |                      |                                                                                             |                      |                                                                                                 |
|----|-----------------------------------------------------------------------------------------------------------------------------------------------------------------------------------------|------|-------------|----------------------|---------------------------------------------------------------------------------------------|----------------------|-------------------------------------------------------------------------------------------------|
| 5. | 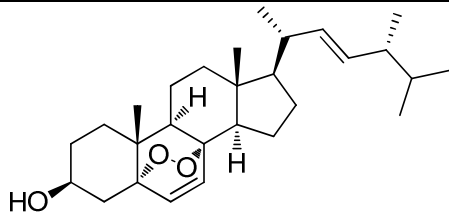 <p><b>Ergosterol peroxide</b><br/>C<sub>28</sub>H<sub>44</sub>O<sub>3</sub></p>                        | 8.73 | 226         | 429.33652<br>(+0.5)  | 411.36, 393.33<br>287.17, 269.26<br>305.14, 191.09<br>267.17, 177.10<br>375.32, 341.39      | ND                   | ND                                                                                              |
| 6. |  <p><b>5,8-Epidioxyergosta-6,9(11),22-trien-3-ol</b><br/>C<sub>28</sub>H<sub>42</sub>O<sub>3</sub></p> | 7.90 | 244         | 427.31998<br>(-1.6)  | 409.31, 285.15<br>303.19, 391.39<br>339.23, 381.39<br>267.18, 175.12<br>363.32, 147.09      | ND                   | ND                                                                                              |
| 7. |  <p><b>Moniliphenone</b><br/>C<sub>16</sub>H<sub>14</sub>O<sub>6</sub></p>                             | 3.62 | 215,<br>283 | 303.08652<br>(+0.7)  | 179.00, 271.08<br>150.97, 146.89<br>179.98, 284.16<br>259.84, 285.15<br>302.19, 183.24      | 301.07196<br>(+0.7)  | 269.04, 283.19<br>148.96, 225.03<br>256.87, 150.76<br>122.96, 104.82<br>241.03, 211.02          |
| 8. |  <p><b>Alamethicin II</b><br/>C<sub>93</sub>H<sub>152</sub>N<sub>22</sub>O<sub>25</sub></p>           | 6.58 | 210         | 1978.13318<br>(-2.0) | 934.81, 764.93<br>950.41, 948.92<br>1203.09, 1959.34,<br>752.58, 1205.46<br>1206.28, 949.75 | 1976.11743<br>(-2.6) | 1849.16, 1440.77<br>773.41, 1568.03<br>1412.95, 1327.86<br>1958.19, 1667.01<br>1848.52, 1425.92 |
| 9. |  <p><b>Longibranchin III</b><br/>C<sub>91</sub>H<sub>150</sub>N<sub>22</sub>O<sub>25</sub></p>       | 6.16 | 209         | 1952.11621<br>(-2.7) | 1932.67, 922.42<br>1177.72, 919.79<br>823.55, 1933.51<br>836.82, 924.43<br>738.34, 774.65   | 1950.10376<br>(-1.6) | 1932.22, 787.52<br>1541.78, 1513.92<br>1422.84, 1667.16<br>1414.89, 1523.87<br>1931.44, 1511.01 |

|     |                                                                                                                                                                                          |      |                     |                     |                                                                                        |                     |                                                                                        |
|-----|------------------------------------------------------------------------------------------------------------------------------------------------------------------------------------------|------|---------------------|---------------------|----------------------------------------------------------------------------------------|---------------------|----------------------------------------------------------------------------------------|
| 10. | 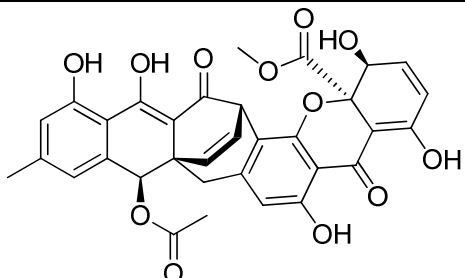 <p><b>Acremoxanthone C</b><br/>C<sub>33</sub>H<sub>26</sub>O<sub>12</sub></p>                           | 6.22 | 222,<br>272,<br>365 | 615.14807<br>(-2.7) | 555.21, 495.18<br>467.20, 523.15<br>387.12, 195.05<br>527.18, 583.19<br>477.17, 505.21 | 613.13428<br>(-1.4) | 581.13, 477.28<br>385.10, 551.17<br>445.07, 553.20<br>521.06, 491.09<br>537.21, 359.17 |
| 11. |  <p><b>Obionin B</b><br/>C<sub>21</sub>H<sub>24</sub>O<sub>5</sub></p>                                  | 7.47 | 241,<br>298,<br>465 | 357.16922<br>(-1.2) | 339.25, 259.03<br>357.28, 311.18<br>329.20, 273.14<br>245.04, 342.19<br>258.09, 231.13 | 355.15579<br>(+2.0) | 341.15, 340.38<br>355.17, 256.00<br>270.21, 257.10<br>327.22, 312.04<br>313.17, 354.50 |
| 12. |  <p><b>Thielavin Q (or Thielavin B methyl ester)</b><br/>C<sub>32</sub>H<sub>36</sub>O<sub>10</sub></p> | 6.87 | 222,<br>274         | 581.23682<br>(-2.2) | 548.65, 165.05<br>417.27, 357.02<br>193.01, 547.61<br>563.31, 562.36<br>581.57, 549.61 | 579.22321<br>(-0.6) | 223.07, 414.86<br>162.98, 414.21<br>207.93, 176.05<br>165.05, 491.30<br>178.01, 535.83 |
| 13. |  <p><b>Zeaenol</b><br/>C<sub>19</sub>H<sub>24</sub>O<sub>7</sub></p>                                   | 3.72 | 237,<br>270,<br>311 | 365.15948<br>(0.0)  | 285.09, 311.28<br>329.25, 267.18<br>219.09, 293.15<br>237.06, 175.08<br>347.16, 243.17 | 363.14493<br>(0.0)  | 188.95, 207.04<br>162.92, 173.94<br>249.15, 191.02<br>235.07, 161.04<br>205.11, 187.08 |

|     |                                                                                                                                                                           |      |                     |                     |                                                                                        |                     |                                                                                        |
|-----|---------------------------------------------------------------------------------------------------------------------------------------------------------------------------|------|---------------------|---------------------|----------------------------------------------------------------------------------------|---------------------|----------------------------------------------------------------------------------------|
| 14. | 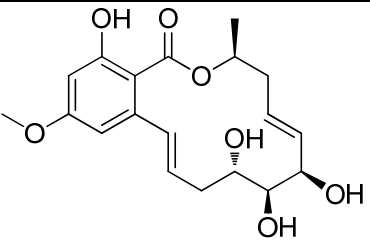 <p><b>7-epi-Zeaenol</b><br/>01003-58-2<br/>C<sub>19</sub>H<sub>24</sub>O<sub>7</sub></p> | 3.97 | 237,<br>270,<br>311 | ND                  | ND                                                                                     | 363.14423<br>(-1.9) | 206.98, 189.07<br>163.04, 148.01<br>249.09, 173.98<br>191.15, 235.09<br>230.96, 204.98 |
| 15. |  <p><b>LL-Z1640-1</b><br/>C<sub>19</sub>H<sub>24</sub>O<sub>7</sub></p>                  | 4.26 | 232,<br>270,<br>311 | 365.15900<br>(-1.3) | 347.18, 329.27<br>311.27, 237.00<br>219.00, 128.99<br>285.18, 175.00<br>251.11, 301.19 | 363.14499<br>(+0.2) | 189.01, 345.07<br>235.02, 206.93<br>217.06, 174.00<br>261.05, 205.09<br>319.14, 301.29 |
| 16. |  <p><b>Hypothemycin</b><br/>C<sub>19</sub>H<sub>22</sub>O<sub>8</sub></p>                | 3.93 | 230,<br>265,<br>306 | 379.13797<br>(-2.0) | 253.04, 235.08<br>217.14, 329.13<br>347.13, 207.08<br>249.07, 303.07<br>311.17, 191.10 | 377.12473<br>(+1.4) | 251.05, 359.05<br>207.06, 178.99<br>305.13, 341.19<br>205.06, 232.90<br>315.12, 193.00 |
| 17. |  <p><b>5,6-Dihydro-9-deoxyzeaenol</b><br/>C<sub>19</sub>H<sub>26</sub>O<sub>6</sub></p> | 4.71 | 228,<br>269,<br>309 | 351.18033<br>(+0.3) | 333.16, 315.12<br>297.11, 289.22<br>271.16, 263.14<br>279.13, 245.22<br>231.19, 249.08 | 349.16568<br>(+0.1) | 303.21, 285.20<br>302.24, 301.16<br>259.13, 332.16<br>329.15, 269.30<br>347.27, 235.12 |
| 18. |  <p><b>5Z-7-Oxozeaenol</b><br/>C<sub>19</sub>H<sub>22</sub>O<sub>7</sub></p>           | 4.20 | 228,<br>272,<br>313 | 363.14349<br>(-0.9) | 345.05, 327.19<br>237.01, 219.13<br>309.22, 283.17<br>319.12, 301.20<br>299.25, 281.09 | 361.12903<br>(-0.7) | 235.01, 191.08<br>343.15, 189.04<br>217.06, 124.88<br>299.16, 317.14<br>273.13, 207.18 |

|     |                                                                                                                                                                             |      |                             |                      |                                                                                               |                      |                                                                                                 |
|-----|-----------------------------------------------------------------------------------------------------------------------------------------------------------------------------|------|-----------------------------|----------------------|-----------------------------------------------------------------------------------------------|----------------------|-------------------------------------------------------------------------------------------------|
| 19. | 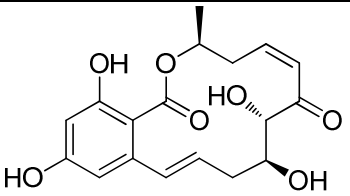 <p><b>15-O-Desmethyl-5Z-7-oxozeaenol</b><br/>C<sub>18</sub>H<sub>20</sub>O<sub>7</sub></p> | 3.42 | 233,<br>274,<br>313         | ND                   | ND                                                                                            | 347.11292<br>(+1.1)  | 220.93, 202.99<br>176.98, 174.98<br>329.07, 284.99<br>303.18, 227.01<br>311.17, 243.03          |
| 20. |  <p><b>Acremonidin A</b><br/>C<sub>33</sub>H<sub>26</sub>O<sub>12</sub></p>                | 5.59 | 217,<br>278,<br>287,<br>359 | 615.14734<br>(-3.8)  | 421.19, 195.00<br>583.19, 333.16<br>361.23, 523.23<br>447.18, 555.24<br>387.23, 495.24        | 613.13367<br>(-2.4)  | 581.18, 445.17<br>595.27, 521.19<br>385.16, 477.24<br>537.13, 419.15<br>503.19, 563.37          |
| 21. |  <p><b>Atroviridin B</b><br/>C<sub>93</sub>H<sub>153</sub>N<sub>23</sub>O<sub>24</sub></p> | 6.31 | 211                         | 1977.14978<br>(-1.7) | 1008.80, 949.36<br>1009.60, 1205.57<br>1747.43, 1006.63<br>1332.12, 771.44<br>812.59, 1120.45 | 1975.13513<br>(-1.8) | 1848.16, 1847.55<br>786.59, 1509.94<br>1665.82, 1830.44<br>1421.91, 998.63<br>1310.65, 1801.09  |
| 22. |  <p><b>Polysporin B</b><br/>C<sub>93</sub>H<sub>153</sub>N<sub>23</sub>O<sub>24</sub></p> | 6.46 | 210                         | 1977.15137<br>(-0.9) | 949.10, 949.91<br>750.45, 823.92<br>765.90, 1204.52<br>752.50, 935.66<br>1848.75, 773.11      | 1975.13428<br>(-2.2) | 1848.06, 772.50<br>1848.80, 1666.00<br>1830.22, 1046.68<br>1212.17, 1649.47<br>1956.35, 1424.98 |
| 23. |  <p><b>5E-7-Oxozeaenol</b><br/>C<sub>19</sub>H<sub>22</sub>O<sub>7</sub></p>             | 4.02 | 228,<br>270,<br>311         | 363.14325<br>(-1.6)  | 345.18, 327.18<br>237.10, 219.09<br>309.12, 301.16<br>265.15, 283.19<br>233.11, 275.12        | 361.12933<br>(+0.1)  | 234.99, 191.09<br>189.04, 343.19<br>217.09, 125.03<br>317.24, 299.12<br>261.15, 273.08          |



|     |                                                                                                                                                                                 |      |                             |                      |                                                                                              |                      |                                                                                                 |
|-----|---------------------------------------------------------------------------------------------------------------------------------------------------------------------------------|------|-----------------------------|----------------------|----------------------------------------------------------------------------------------------|----------------------|-------------------------------------------------------------------------------------------------|
| 24. | 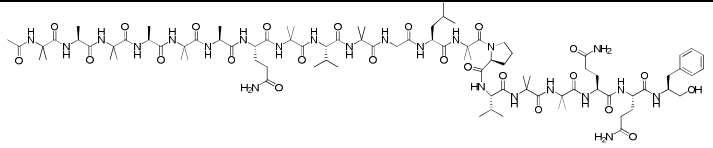 <p><b>Trichokonin VI</b><br/>C<sub>90</sub>H<sub>149</sub>N<sub>23</sub>O<sub>24</sub></p>     | 5.87 | 210                         | 1937.11853<br>(-1.7) | 1657.07, 726.46<br>922.29, 756.39<br>1180.44, 1178.94<br>1298.93, 923.33<br>1586.79, 1564.66 | 1935.10242<br>(-2.5) | 772.43, 1917.19<br>1651.98, 1495.80<br>1296.80, 1808.14<br>1737.05, 1407.86<br>1581.23, 1161.67 |
| 25. |  <p><b>Epolone A</b><br/>C<sub>32</sub>H<sub>40</sub>O<sub>6</sub></p>                         | 6.42 | 206,<br>220,<br>254,<br>363 | 521.28815<br>(-3.1)  | 367.26, 503.39<br>385.29, 201.19<br>337.26, 164.93<br>177.11, 245.16<br>203.07, 189.00       | 519.27509<br>(-0.2)  | 477.25, 383.31<br>478.36, 459.46<br>501.27, 164.01<br>479.56, 419.06<br>182.00, 351.47          |
| 26. |  <p><b>Pycnidione</b><br/>C<sub>33</sub>H<sub>40</sub>O<sub>7</sub></p>                        | 5.95 | 220,<br>254,<br>363         | 549.28290<br>(-3.2)  | 531.39, 485.31<br>385.26, 513.41<br>367.20, 365.31<br>383.26, 201.02<br>397.42, 503.40       | 547.26941<br>(-1.2)  | 162.99, 505.35<br>383.28, 487.39<br>503.36, 529.28<br>463.32, 461.41<br>519.35, 469.32          |
| 27. |  <p><b>Trichokonin VII</b><br/>C<sub>91</sub>H<sub>151</sub>N<sub>23</sub>O<sub>24</sub></p> | 6.01 | 210                         | 1951.13403<br>(-1.8) | 724.56, 908.17<br>1461.13, 1092.90<br>687.73, 823.14<br>1844.45, 1933.36<br>772.75, 1906.27  | 1949.11682<br>(-3.1) | 786.56, 1931.13<br>1665.97, 1509.98<br>1822.11, 1310.83<br>1751.15, 1913.04<br>1161.58, 1906.97 |

|     |                                                                                                                                                                                              |      |                                     |                      |                                                                                               |                      |                                                                                                  |
|-----|----------------------------------------------------------------------------------------------------------------------------------------------------------------------------------------------|------|-------------------------------------|----------------------|-----------------------------------------------------------------------------------------------|----------------------|--------------------------------------------------------------------------------------------------|
| 28. | 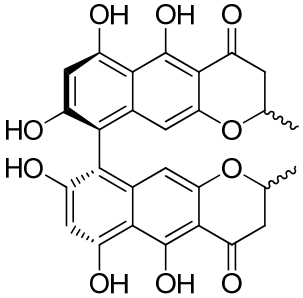 <p><b>Cephalochromin</b><br/>C<sub>28</sub>H<sub>22</sub>O<sub>10</sub></p>                                 | 5.45 | 230,<br>270,<br>293,<br>328,<br>417 | 519.12671<br>(-3.6)  | 260.09, 501.21<br>477.23, 459.17<br>519.24, 473.13<br>245.02, 476.34<br>218.04, 219.01        | 517.11383<br>(-0.4)  | 499.12, 517.14<br>473.29, 258.04<br>475.15, 457.23<br>449.17, 500.23<br>474.17, 431.27           |
| 29. |  <p><b>Alamethicin F50</b><br/>C<sub>92</sub>H<sub>151</sub>N<sub>23</sub>O<sub>24</sub></p>                | 6.15 | 217                                 | 1963.13428<br>(-1.6) | 949.25, 1120.19<br>752.50, 751.32<br>950.26, 772.65<br>950.87, 849.58<br>1012.56, 1006.82     | 1961.11914<br>(-1.9) | 1834.13, 772.55<br>1651.85, 1943.13<br>1424.79, 1495.89<br>1816.28, 1900.07<br>1832.65, 1835.08  |
| 30. |  <p><b>Atroviridin D</b><br/>C<sub>91</sub>H<sub>149</sub>N<sub>23</sub>O<sub>24</sub><br/>01008-44-1</p>   | 5.27 | 217                                 | 1949.11841<br>(-1.8) | 720.23, 1016.80<br>1090.70, 1192.25<br>1551.42, 580.30<br>739.55                              | 1947.10364<br>(-1.9) | 772.49, 1834.02<br>1929.20, 1496.03<br>1652.13, 1296.88<br>1173.65, 1407.82<br>1581.10, 651.41   |
| 31. |  <p><b>Atroviridin E</b><br/>C<sub>92</sub>H<sub>151</sub>N<sub>23</sub>O<sub>25</sub><br/>01008-44-2</p>  | 5.35 | 215                                 | 1979.12988<br>(-1.3) | 987.49, 988.14<br>988.93, 1009.45<br>1010.91, 1010.27<br>1011.88, 623.04<br>1001.74, 1000.73  | 1977.11316<br>(-2.4) | 1032.40, 1849.36<br>1685.33, 1496.26<br>1903.04, 1061.79<br>1800.68, 1820.18<br>1795.63, 1737.30 |
| 32. |  <p><b>Atroviridin F</b><br/>C<sub>93</sub>H<sub>153</sub>N<sub>23</sub>O<sub>25</sub><br/>01008-44-3</p> | 5.51 | 210                                 | 1993.14758<br>(-0.2) | 1002.30, 1010.24<br>665.31, 928.88<br>1710.32, 1483.93<br>933.94, 1174.82<br>1104.70, 1276.67 | 1991.13818<br>(+2.3) | 1535.84, 1919.80<br>1187.93, 1115.79                                                             |

|     |                                                                                                                                                                               |      |     |                      |                                                                                              |                      |                                                                                                  |
|-----|-------------------------------------------------------------------------------------------------------------------------------------------------------------------------------|------|-----|----------------------|----------------------------------------------------------------------------------------------|----------------------|--------------------------------------------------------------------------------------------------|
| 33. | 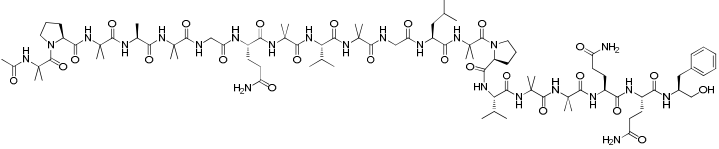 <p><b>Atroviridin G</b><br/> <math>C_{91}H_{149}N_{23}O_{24}</math><br/> 01008-44-4</p>      | 5.55 | 217 | 1949.11914<br>(-1.4) | 920.33, 1175.79<br>1018.75, 1334.09<br>1635.51, 1611.10<br>921.22, 1573.14<br>795.61, 972.47 | 1947.10217<br>(-2.6) | 1820.12, 1819.52<br>1802.04, 772.46<br>1482.02, 1911.05<br>1322.50, 1567.10<br>1296.50, 1480.89  |
| 34. |  <p><b>Atroviridin H</b><br/> <math>C_{91}H_{149}N_{23}O_{25}</math><br/> 01008-44-5</p>     | 6.25 | 217 | 1965.12109<br>(+2.2) | 951.65, 767.41<br>952.69, 766.55<br>1207.64, 866.30<br>867.39, 1206.61<br>950.37, 865.36     | 1963.10486<br>(+1.3) | 1835.18, 773.56<br>1427.01, 1944.18<br>1836.29, 1399.03<br>1313.84, 1408.86<br>1553.87, 1834.49  |
| 35. |  <p><b>Atroviridin I</b><br/> <math>C_{91}H_{149}N_{23}O_{24}</math><br/> 01008-44-6</p>     | 5.98 | 217 | 1949.12170<br>(-0.1) | 923.37, 921.46<br>751.22, 754.46<br>948.45, 1559.24<br>1009.45, 936.56<br>752.66, 1175.47    | 1947.10352<br>(-1.9) | 1820.18, 772.63<br>1637.75, 1393.90<br>637.41, 754.55<br>1801.87, 933.88<br>1802.49, 1929.50     |
| 36. |  <p><b>Trichobrachin D-I</b><br/> <math>C_{55}H_{97}N_{11}O_{13}</math><br/> 01008-44-7</p> | 6.04 | 220 | 1120.72974<br>(-3.8) | 920.58, 512.31<br>609.43, 921.58<br>1120.73, 610.43<br>513.31, 1121.73<br>922.58, 201.16     | 1118.71753<br>(-1.7) | 1088.78, 1100.73<br>1089.53, 1046.47<br>1109.49, 1047.08<br>1058.74, 1071.04<br>1076.45, 1101.51 |
| 37. |  <p><b>Atroviridin J</b><br/> <math>C_{94}H_{154}N_{22}O_{25}</math><br/> 01008-44-12</p>  | 6.75 | 219 | 1992.15002<br>(-1.4) | 948.23, 1203.45<br>764.30, 863.19<br>770.48, 1968.08<br>1972.89, 877.11<br>962.47, 756.66    | 1990.13391<br>(-2.2) | 1863.14, 1454.96<br>787.52, 1426.88<br>1582.04, 1327.88<br>1862.52, 1972.16<br>1681.03, 1422.89  |

|     |                                                                                                                                                                                                   |      |     |                     |                                                                                        |                     |                                                                                        |
|-----|---------------------------------------------------------------------------------------------------------------------------------------------------------------------------------------------------|------|-----|---------------------|----------------------------------------------------------------------------------------|---------------------|----------------------------------------------------------------------------------------|
| 38. | 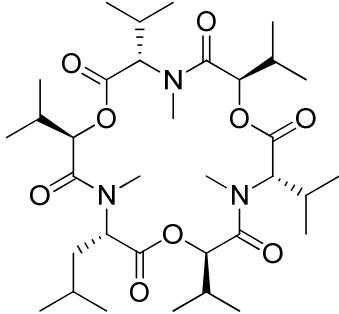 <p><b>Enniatin D</b><br/>C<sub>34</sub>H<sub>59</sub>N<sub>3</sub>O<sub>9</sub></p>                              | 6.95 | 211 | 654.42932<br>(-4.7) | 196.06, 541.26<br>210.09, 214.04<br>441.23, 228.07<br>626.34, 427.29<br>328.30, 527.48 | 652.41669<br>(-1.8) | 229.99, 457.46<br>439.15, 212.15<br>425.28, 244.21<br>226.20, 421.19<br>339.28, 407.34 |
| 39. |  <p><b>1,4-Perhydrooxazine-2,5-dione II</b><br/>10700-97-13<br/>C<sub>12</sub>H<sub>21</sub>NO<sub>3</sub></p>   | 7.44 | 211 | 228.16049<br>(4.7)  | 200.09, 99.99<br>114.03, 156.23<br>146.07, 210.27<br>175.29, 228.27<br>153.99, 159.93  | 226.14508<br>(+0.9) | 182.10, 183.00<br>144.13, 184.05<br>164.03, 208.13<br>112.09, 154.11<br>128.03, 197.32 |
| 40. |  <p><b>Enniatin E1</b><br/>C<sub>35</sub>H<sub>61</sub>N<sub>3</sub>O<sub>9</sub></p> <p><b>Enniatin E2</b></p> | 7.17 | 206 | 668.44592<br>(-3.2) | 210.12, 228.10<br>541.36, 196.09<br>555.34, 214.04<br>441.25, 640.35<br>455.36, 328.22 | 666.43359<br>(+0.1) | 226.18, 439.34<br>244.13, 230.13<br>212.03, 453.22<br>421.40, 435.44<br>333.04, 236.16 |

|     |                                                                                                                                                                                                                                               |      |     |                     |                                                                                        |                     |                                                                                        |
|-----|-----------------------------------------------------------------------------------------------------------------------------------------------------------------------------------------------------------------------------------------------|------|-----|---------------------|----------------------------------------------------------------------------------------|---------------------|----------------------------------------------------------------------------------------|
| 41. | <p style="text-align: center;"><math>C_{35}H_{61}N_3O_9</math></p> 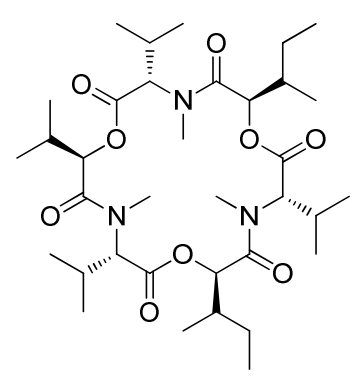 <p style="text-align: center;"><b>Enniatin I</b><br/><math>C_{35}H_{61}N_3O_9</math></p> | 7.22 | 211 | 668.44495<br>(-4.6) | 210.13, 541.35<br>228.14, 196.12<br>214.11, 441.28<br>555.35, 640.41<br>455.29, 328.21 | 666.43353<br>(0.0)  | 226.18, 439.38<br>244.19, 453.45<br>212.18, 230.08<br>421.37, 435.23<br>339.44, 223.84 |
| 42. |  <p style="text-align: center;"><b>Enniatin B1</b><br/><math>C_{34}H_{59}N_3O_9</math></p>                                                                   | 7.01 | 211 | 654.43042<br>(-3.0) | 210.08, 196.09<br>214.13, 541.45<br>527.39, 228.09<br>441.23, 626.45<br>427.28, 314.16 | 652.41779<br>(-0.1) | 439.37, 212.01<br>230.03, 425.27<br>226.20, 244.12<br>421.39, 438.61<br>339.43, 407.27 |
| 43. |  <p style="text-align: center;"><b>Roseotoxin S</b><br/><math>C_{23}H_{39}N_3O_8</math></p>                                                                | 4.12 | 220 | 486.27963<br>(-2.8) | 468.34, 458.30<br>440.35, 385.19<br>287.18, 414.32<br>273.18, 357.16<br>333.26, 314.15 | 484.26636<br>(-0.2) | 440.12, 245.06<br>289.21, 227.21<br>440.77, 270.86<br>466.34, 287.38<br>301.38, 269.18 |

|     |                                                                                                                                                                                 |      |     |                     |                                                                                        |                     |                                                                                        |
|-----|---------------------------------------------------------------------------------------------------------------------------------------------------------------------------------|------|-----|---------------------|----------------------------------------------------------------------------------------|---------------------|----------------------------------------------------------------------------------------|
| 44. | 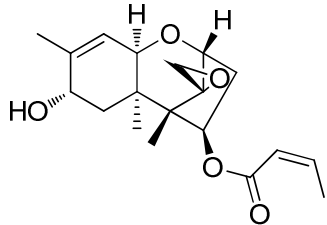 <p><b>Trichothecinol B</b><br/>C<sub>19</sub>H<sub>26</sub>O<sub>5</sub></p>                   | 4.03 | 206 | 335.18533<br>(+0.1) | 231.06, 195.09<br>213.06, 249.08<br>185.05, 125.05<br>123.06, 201.17<br>317.21, 171.08 | 333.17102<br>(+1.0) | 289.19, 286.96<br>303.30, 318.13<br>331.33, 226.95<br>253.36, 248.81<br>297.38, 265.09 |
| 45. |  <p><b>Trichodepsipeptide A</b><br/>C<sub>36</sub>H<sub>56</sub>N<sub>4</sub>O<sub>9</sub></p> | 6.41 | 224 | 689.41101<br>(-1.4) | 671.41, 661.44<br>446.29, 576.35<br>489.44, 428.35<br>544.36, 421.38<br>449.20, 371.29 | 687.39838<br>(+1.3) | 657.39, 518.22<br>656.73, 291.21<br>619.46, 611.42<br>601.38, 643.31<br>587.48, 307.35 |
| 46. |  <p><b>Crotoicin</b><br/>C<sub>19</sub>H<sub>24</sub>O<sub>5</sub></p>                         | 4.24 | 215 | 333.16998<br>(1.0)  | 247.10, 229.09<br>201.09, 173.09<br>211.06, 123.04<br>187.04, 183.12<br>159.01, 124.98 | ND                  | ND                                                                                     |
| 47. |  <p><b>Guangomide A</b><br/>C<sub>31</sub>H<sub>46</sub>N<sub>4</sub>O<sub>9</sub></p>       | 5.49 | 217 | 619.33246<br>(-2.1) | 362.18, 258.11<br>445.20, 601.30<br>344.19, 544.28<br>276.18, 516.27<br>473.38, 206.05 | 617.31836<br>(-1.4) | 461.21, 448.27<br>274.17, 292.30<br>185.93, 430.24<br>204.10, 256.19<br>217.04, 403.07 |

|     |                                                                                                                                                                 |      |             |                     |                                                                                        |                     |                                                                                        |
|-----|-----------------------------------------------------------------------------------------------------------------------------------------------------------------|------|-------------|---------------------|----------------------------------------------------------------------------------------|---------------------|----------------------------------------------------------------------------------------|
| 48. | 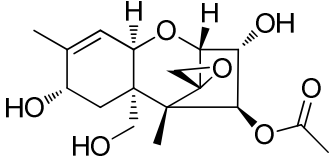 <p><b>Neosolaniol</b><br/>C<sub>19</sub>H<sub>26</sub>O<sub>8</sub></p>        | 1.71 | 200         | 383.17029<br>(+0.6) | 365.33, 355.37<br>382.51, 245.18<br>340.74, 335.32<br>305.14, 323.00<br>215.34, 383.33 | ND                  | ND                                                                                     |
| 49. |  <p><b>Trichothosporon A</b><br/>C<sub>22</sub>H<sub>30</sub>O<sub>7</sub></p> | 3.24 | 226         | 407.20605<br>(-0.9) | 389.17, 371.24<br>375.05, 353.20<br>233.21, 303.18<br>347.20, 247.22<br>357.14, 379.22 | 405.19235<br>(+1.2) | 361.30, 373.03<br>387.01, 390.26<br>377.26, 262.47<br>346.04, 241.19<br>347.37, 316.90 |
| 50. |  <p><b>HT-2 Toxin</b><br/>C<sub>22</sub>H<sub>32</sub>O<sub>8</sub></p>        | 3.90 | 222         | 425.21704<br>(+0.1) | 263.05, 245.08<br>407.35, 408.29<br>325.29, 227.10<br>323.19, 199.17<br>305.19, 215.06 | 423.20224<br>(-0.5) | 291.24, 355.16<br>387.15, 393.04<br>377.22, 278.55<br>267.20, 404.90<br>305.90, 395.79 |
| 51. |  <p><b>Pestalotin</b><br/>C<sub>11</sub>H<sub>18</sub>O<sub>4</sub></p>       | 3.20 | 237         | 215.12779<br>(0.0)  | 197.05, 153.11<br>183.13, 137.08<br>141.06, 171.06<br>165.13, 151.10<br>169.02, 139.09 | 213.11349<br>(+1.2) | 169.08, 112.88<br>151.10, 197.79<br>181.05, 172.09<br>139.04, 153.00<br>185.97, 148.84 |
| 52. | 01008-35-5*                                                                                                                                                     | 3.65 | 254,<br>359 | 293.13907<br>(2.5)  | 275.14, 229.23<br>257.18, 261.22<br>191.13, 135.00<br>215.02, 247.22<br>233.27, 263.25 | 291.12457<br>(+2.7) | 249.00, 205.06<br>163.00, 176.99<br>175.06, 204.03<br>231.97, 164.96<br>243.18, 273.11 |
| 53. | 01008-34-4*                                                                                                                                                     | 3.26 | 254,<br>359 | 293.13794<br>(-1.4) | 275.22, 229.23<br>191.12, 135.04<br>257.16, 215.14<br>107.07, 175.10<br>177.15, 201.22 | 291.12411<br>(+1.1) | 249.14, 205.08<br>162.97, 243.09<br>263.20, 151.01<br>135.03, 204.07<br>175.01, 176.87 |

|     |                                                                                                                                                                                |      |             |                     |                                                                                        |                     |                                                                                        |
|-----|--------------------------------------------------------------------------------------------------------------------------------------------------------------------------------|------|-------------|---------------------|----------------------------------------------------------------------------------------|---------------------|----------------------------------------------------------------------------------------|
| 54. | 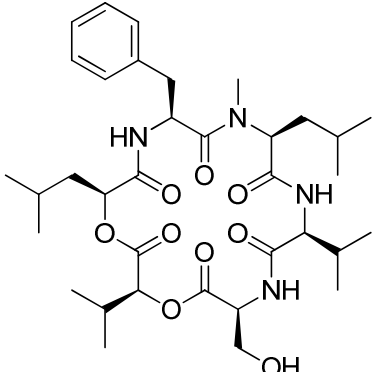 <p><b>Trichodepsipeptide B</b><br/>C<sub>35</sub>H<sub>54</sub>N<sub>4</sub>O<sub>9</sub></p> | 5.00 | 219         | 675.39630<br>(-0.1) | 657.39, 647.44<br>432.29, 576.42<br>421.35, 414.29<br>449.29, 489.40<br>530.29, 674.45 | 673.38123<br>(-0.9) | 643.36, 645.42<br>504.37, 291.09<br>655.23, 641.47<br>485.66, 486.27<br>559.42, 629.47 |
| 55. |  <p><b>Synthetic intermediate</b><br/>C<sub>19</sub>H<sub>26</sub>O<sub>6</sub></p>           | 2.87 | 211         | 351.17999<br>(-0.6) | 247.10, 229.07<br>217.11, 211.08<br>201.16, 187.05<br>333.15, 265.09<br>173.08, 199.10 | ND                  | ND                                                                                     |
| 56. |  <p><b>2-Hydroxyacoronene</b><br/>C<sub>15</sub>H<sub>24</sub>O<sub>2</sub></p>              | 4.02 | 244         | 237.18456<br>(-1.5) | 219.09, 201.06<br>147.04, 161.06<br>151.02, 191.04<br>163.05, 177.21<br>165.05, 135.04 | 235.17094<br>(+2.5) | 217.18, 191.06<br>235.04, 207.30<br>192.00, 189.08<br>149.00, 150.86<br>175.01, 166.82 |
| 57. |  <p><b>Pughinin A</b><br/>C<sub>23</sub>H<sub>32</sub>O<sub>3</sub></p>                     | 5.15 | 226,<br>282 | 357.24219<br>(-0.6) | 136.93, 215.13<br>339.28, 203.14<br>173.05, 159.12<br>297.19, 145.03<br>146.98, 191.10 | 355.22855<br>(+1.9) | 355.20, 313.08<br>311.19, 134.90<br>341.18, 244.98<br>337.22, 327.19<br>285.84, 269.04 |



|     |                                                                                                                                                                                               |      |             |                     |                                                                                        |                     |                                                                                        |
|-----|-----------------------------------------------------------------------------------------------------------------------------------------------------------------------------------------------|------|-------------|---------------------|----------------------------------------------------------------------------------------|---------------------|----------------------------------------------------------------------------------------|
| 58. | 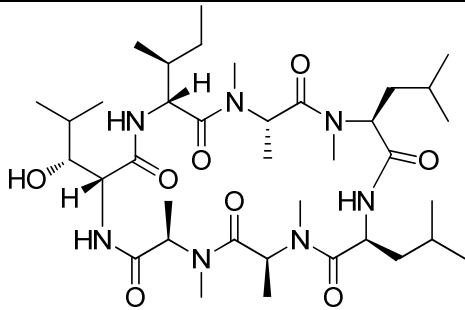 <p><b>Ternatin</b><br/>C<sub>37</sub>H<sub>67</sub>N<sub>7</sub>O<sub>8</sub></p>                            | 5.72 | 215         | 738.51019<br>(-3.0) | 411.34, 720.51<br>666.41, 326.20<br>295.23, 395.30<br>681.51, 635.46<br>413.20, 710.54 | 736.49689<br>(-1.3) | 664.49, 511.46<br>455.35, 665.23<br>466.11, 493.43<br>355.50, 357.34<br>448.55, 466.71 |
| 59. |  <p><b>1,4-Perhydrooxazine-2,5-dione I</b><br/>10700-97-3<br/>C<sub>11</sub>H<sub>19</sub>NO<sub>3</sub></p> | 6.75 | 217         | 214.14348<br>(-1.4) | 186.06, 85.96<br>157.97, 140.94<br>168.14, 172.04<br>179.17                            | 212.12924<br>(+0.1) | 167.98, 129.88<br>169.18, 194.16<br>111.79, 170.12<br>170.96, 197.96<br>150.12, 128.07 |
| 60. |  <p><b>Trichothecin</b><br/>C<sub>19</sub>H<sub>24</sub>O<sub>5</sub></p>                                    | 4.60 | 226         | 333.16989<br>(+0.7) | 211.08, 229.09<br>247.13, 201.08<br>186.98, 203.09<br>173.13, 175.10<br>158.95, 125.03 | 331.15533<br>(+0.7) | 287.25, 263.06<br>269.34, 313.13<br>299.11, 271.15<br>285.14, 277.34<br>303.75, 258.90 |
| 61. |  <p><b>CJ-15,696</b><br/>C<sub>19</sub>H<sub>19</sub>NO<sub>3</sub></p>                                    | 3.91 | 204,<br>233 | 310.14337<br>(-1.3) | 292.17, 268.18<br>282.15, 200.07<br>238.11, 214.07<br>188.03, 254.11<br>242.15, 240.17 | 308.12881<br>(-1.3) | 280.11, 308.18<br>293.12, 236.21<br>266.16, 262.17<br>250.12, 198.06<br>251.05, 281.17 |

|     |                                                                                                                                                                 |      |             |                     |                                                                                        |                     |                                                                                        |
|-----|-----------------------------------------------------------------------------------------------------------------------------------------------------------------|------|-------------|---------------------|----------------------------------------------------------------------------------------|---------------------|----------------------------------------------------------------------------------------|
| 62. | 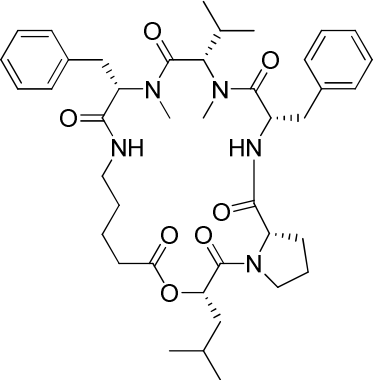 <p><b>T987A</b><br/>C<sub>41</sub>H<sub>57</sub>N<sub>5</sub>O<sub>7</sub></p> | 5.84 | 224         | 732.43097<br>(-2.7) | 619.36, 591.43<br>704.43, 688.54<br>520.33, 581.48<br>458.29, 472.42<br>633.46, 575.54 | 730.41754<br>(-1.3) | 631.41, 420.32<br>501.38, 520.38<br>402.20, 545.44<br>273.08, 259.14<br>547.39, 519.38 |
| 63. | 01009-22-3P*                                                                                                                                                    | 3.22 | 237         | 215.12820<br>(+1.9) | 197.07, 153.09<br>183.10, 137.07<br>169.09, 151.06<br>165.14, 141.06<br>179.16, 119.11 | 213.11360<br>(+1.7) | 169.06, 198.08<br>112.92, 150.93<br>180.97, 141.40<br>136.78, 82.97<br>212.89, 170.04  |
| 64. |  <p><b>Pyridoxatin</b><br/>C<sub>15</sub>H<sub>21</sub>NO<sub>3</sub></p>      | 4.55 | 213,<br>289 | 264.15979<br>(+1.4) | 139.93, 153.92<br>167.97, 182.03<br>180.03, 194.07<br>208.03, 196.07<br>166.04, 127.98 | 262.14429<br>(-2.2) | 234.09, 218.10<br>243.98, 262.17<br>242.20, 200.19<br>124.98, 245.14<br>216.18, 175.14 |
| 65. | 01007-114-3*                                                                                                                                                    | 6.01 | 219         | 338.21103<br>(-1.3) | 216.04, 230.09<br>202.15, 189.95<br>258.17, 256.13<br>244.08, 282.14<br>268.25, 242.14 | ND                  | ND                                                                                     |

|     |                                                                                                                                                           |      |             |                     |                                                                                        |                     |                                                                                        |
|-----|-----------------------------------------------------------------------------------------------------------------------------------------------------------|------|-------------|---------------------|----------------------------------------------------------------------------------------|---------------------|----------------------------------------------------------------------------------------|
| 66. | 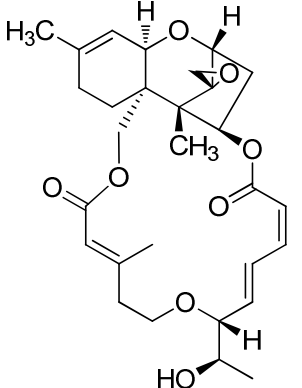 <p><b>Roridin E</b><br/>C<sub>29</sub>H<sub>38</sub>O<sub>8</sub></p>    | 5.32 | 222,<br>263 | 515.26343<br>(-1.0) | 361.21, 231.11<br>249.13, 497.35<br>331.25, 213.08<br>343.23, 185.02<br>203.11, 159.11 | 513.24957<br>(+0.3) | 359.23, 402.67<br>469.45, 385.42<br>483.30, 451.41<br>201.13, 265.11<br>433.69, 429.01 |
| 67. |  <p><b>Ramiferin</b><br/>C<sub>31</sub>H<sub>40</sub>O<sub>5</sub></p>   | 6.09 | 224,<br>282 | 493.29407<br>(-1.6) | 339.19, 475.31<br>351.38, 369.33<br>215.24, 189.03<br>175.10, 203.20<br>227.13, 357.35 | 491.27982<br>(-1.0) | 473.43, 445.27<br>447.38, 474.30<br>344.18, 491.15<br>326.24, 455.41<br>227.03, 421.59 |
| 68. |  <p><b>CJ-16,169</b><br/>C<sub>19</sub>H<sub>21</sub>NO<sub>3</sub></p> | 4.19 | 206,<br>232 | 312.15927<br>(-0.5) | 294.19, 282.25<br>200.07, 254.11<br>214.11, 188.05<br>240.15, 228.08<br>270.19, 268.17 | 310.14450<br>(-1.2) | 280.15, 310.20<br>308.13, 281.23<br>252.11, 209.13<br>236.18, 198.05<br>262.07, 309.21 |

|     |                                                                                                                                                                 |      |             |                     |                                                                                        |                     |                                                                                        |
|-----|-----------------------------------------------------------------------------------------------------------------------------------------------------------------|------|-------------|---------------------|----------------------------------------------------------------------------------------|---------------------|----------------------------------------------------------------------------------------|
| 69. | 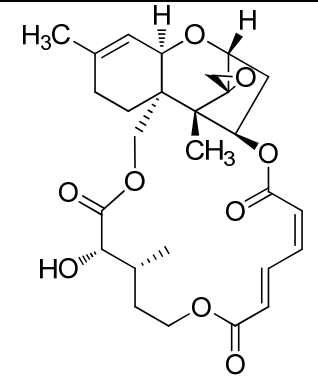 <p><b>Verrucarin A</b><br/>C<sub>27</sub>H<sub>34</sub>O<sub>9</sub></p>       | 4.49 | 226,<br>259 | 503.22672<br>(-1.7) | 457.12, 373.16<br>249.10, 231.18<br>333.29, 390.90<br>213.09, 439.25<br>185.12, 195.14 | 501.21329<br>(+0.6) | 253.17, 457.35<br>473.30, 371.34<br>225.08, 483.25<br>209.16, 353.19<br>335.13, 191.13 |
| 70. |  <p><b>Purpactin A</b><br/>C<sub>23</sub>H<sub>26</sub>O<sub>7</sub></p>       | 5.85 | 230,<br>282 | 415.17535<br>(+0.5) | NF                                                                                     | 413.16061<br>(+0.1) | 309.07, 353.15<br>294.28, 323.17<br>321.14, 134.88<br>278.15, 191.12<br>279.14, 293.21 |
| 71. |  <p><b>Dihydroquercetin</b><br/>C<sub>15</sub>H<sub>12</sub>O<sub>7</sub></p> | 2.12 | 228,<br>289 | 305.06595<br>(+1.2) | 258.99, 287.01<br>152.93, 194.94<br>148.99, 231.02<br>179.07, 122.88<br>166.92, 161.07 | 303.05081<br>(-0.7) | 285.08, 176.90<br>124.80, 275.06<br>258.99, 179.00<br>274.30, 241.09<br>217.05, 214.83 |

|     |                                                                                                                                                                              |      |             |                                               |                                                                                        |                     |                                                                                        |
|-----|------------------------------------------------------------------------------------------------------------------------------------------------------------------------------|------|-------------|-----------------------------------------------|----------------------------------------------------------------------------------------|---------------------|----------------------------------------------------------------------------------------|
| 72. | 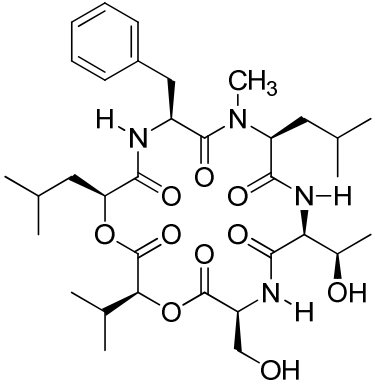 <p><b>Hirsutatin A</b><br/>C<sub>34</sub>H<sub>52</sub>N<sub>4</sub>O<sub>10</sub></p>      | 5.50 | 217         | 677.37390<br>(-2.5)                           | 659.37, 641.42<br>434.27, 649.49<br>514.28, 532.28<br>489.22, 416.30<br>421.33, 398.30 | 675.36121<br>(+0.2) | 645.31, 506.34<br>505.25, 488.00<br>444.11, 470.23<br>291.25, 631.48<br>613.37, 601.44 |
| 73. |  <p><b>Aphidicolin</b><br/>C<sub>20</sub>H<sub>34</sub>O<sub>4</sub></p>                    | 3.62 | ND          | 321.24268<br>(+0.8)<br>(M+H-H <sub>2</sub> O) | 222.08, 321.27<br>295.29, 169.08<br>339.37, 178.20<br>322.40, 120.98<br>269.28, 216.17 | ND                  | ND                                                                                     |
| 74. |  <p><b>Cytochalasin D; Zygosporin A</b><br/>C<sub>30</sub>H<sub>37</sub>NO<sub>6</sub></p> | 4.33 | 220,<br>285 | 508.26886<br>(-1.0)                           | 430.24, 490.15<br>448.25, 412.34<br>388.44, 406.32<br>370.27, 472.29<br>384.42, 402.38 | 506.25522<br>(+0.8) | 348.33, 446.28<br>366.27, 488.15<br>428.23, 402.99<br>385.26, 464.40<br>462.34, 287.10 |
| 75. |  <p><b>19,20-epoxycytochalasin Q</b><br/>C<sub>30</sub>H<sub>37</sub>NO<sub>7</sub></p>   | 4.71 | 212         | 524.26288<br>(-2.7)                           | 404.26, 428.29<br>446.28, 390.27<br>386.22, 464.39<br>368.17, 376.30<br>418.26, 358.34 | 522.25012<br>(+0.8) | 462.37, 422.23<br>480.36, 504.20<br>444.28, 284.23<br>401.30, 266.10<br>404.21, 419.45 |

|     |                                                                                                                                                                    |              |                     |                                             |                                                                                        |                     |                                                                                        |
|-----|--------------------------------------------------------------------------------------------------------------------------------------------------------------------|--------------|---------------------|---------------------------------------------|----------------------------------------------------------------------------------------|---------------------|----------------------------------------------------------------------------------------|
| 76. | 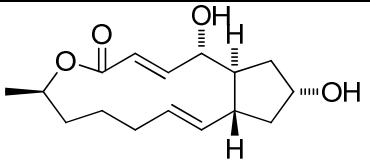 <p><b>Brefeldin A</b><br/>C<sub>16</sub>H<sub>24</sub>O<sub>4</sub></p>           | 3.71         | 228                 | 281.17532<br>(+2.1)                         | 245.08, 263.11<br>199.08, 217.16<br>227.13, 163.04<br>185.03, 132.98<br>189.04, 235.12 | 279.16049<br>(+1.1) | 235.13, 261.12<br>161.23, 251.17<br>280.00, 252.07<br>96.85, 190.99<br>173.20, 138.84  |
| 77. |  <p><b>PC<sub>3</sub></b><br/>C<sub>11</sub>H<sub>16</sub>O<sub>4</sub></p>       | 3.34<br>3.67 | 230                 | 213.11263<br>(+2.3)                         | 213.09, 110.88<br>167.04, 195.10<br>84.89, 138.93<br>152.98, 124.99<br>108.94, 106.94  | 211.09760<br>(+0.1) | 167.13, 183.93<br>181.02, 211.08<br>137.13, 178.84<br>183.12, 96.85<br>112.93, 192.84  |
| 78. |  <p><b>Leporin B</b><br/>C<sub>22</sub>H<sub>25</sub>NO<sub>3</sub></p>           | 6.10         | 220,<br>241         | 352.19003<br>(-2.0)                         | 216.01, 230.09<br>244.08, 296.17<br>270.11, 335.20<br>258.14, 282.13<br>272.11, 278.11 | 350.17621<br>(+0.1) | 350.12, 115.88<br>306.22, 197.97<br>228.03, 332.30<br>201.00, 214.01<br>185.98, 322.16 |
| 79. |  <p><b>Viridiol</b><br/>C<sub>20</sub>H<sub>18</sub>O<sub>6</sub></p>            | 2.95         | 244,<br>319         | 355.11725<br>(-1.0)                         | 281.05, 309.14<br>337.12, 249.08<br>277.13, 308.39<br>279.21, 305.17<br>253.15, 291.08 | 353.10342<br>(+1.0) | 278.96, 325.17<br>335.16, 297.15<br>338.10, 279.87<br>294.41, 321.26<br>277.25, 309.15 |
| 80. |  <p><b>Viridicatumtoxin</b><br/>C<sub>30</sub>H<sub>31</sub>NO<sub>10</sub></p> | 5.74         | 235,<br>383,<br>432 | 548.19080<br>(-1.3)<br>M+H-H <sub>2</sub> O | 509.19, 548.23<br>510.21, 549.23<br>492.20, 380.23<br>493.22, 523.23<br>522.12, 530.21 | 564.18689<br>(-1.1) | 502.31, 547.22<br>546.17, 520.27<br>529.22, 485.19<br>405.23, 459.32<br>503.27, 379.25 |

|     |                                                                                                                                                                                                           |      |                     |                                |                                                                                        |                     |                                                                                        |
|-----|-----------------------------------------------------------------------------------------------------------------------------------------------------------------------------------------------------------|------|---------------------|--------------------------------|----------------------------------------------------------------------------------------|---------------------|----------------------------------------------------------------------------------------|
| 81. | 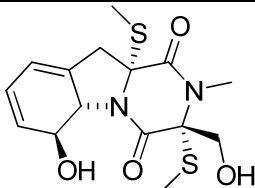 <p><b>Bisdethiobis(methylthio) gliotoxin</b><br/>C<sub>15</sub>H<sub>20</sub>N<sub>2</sub>O<sub>4</sub>S<sub>2</sub></p> | 3.33 | 215,<br>267         | 357.09399<br>(+0.7)            | 309.04, 243.12<br>291.01, 215.17<br>192.11, 233.19<br>261.20, 143.95<br>281.22, 278.11 | 355.07996<br>(+2.2) | 277.11, 340.12<br>325.09, 307.04<br>327.11, 337.12<br>309.09, 354.96<br>278.08, 283.19 |
| 82. |  <p><b>Heptelidic acid</b><br/>C<sub>15</sub>H<sub>20</sub>O<sub>5</sub></p>                                             | 3.80 | 226                 | 281.13898<br>(+2.2)            | 263.02, 245.02<br>217.05, 221.06<br>235.06, 203.06<br>189.04, 199.06<br>227.05, 171.10 | 279.12384<br>(+0.2) | 205.23, 173.17<br>235.10, 191.11<br>217.03, 149.12<br>207.11, 189.16<br>176.94, 248.97 |
| 83. |  <p><b>Heptelidic acid chlorhydrin</b><br/>C<sub>15</sub>H<sub>21</sub>ClO<sub>5</sub></p>                               | 3.88 | 232                 | 317.11490<br>(-2.1)<br>neutral | 298.98, 253.10<br>281.02, 245.06<br>217.11, 263.07<br>239.10, 203.13<br>227.17, 235.20 | 315.10062<br>(+2.2) | 279.14, 271.02<br>261.06, 234.92<br>191.16, 204.95<br>243.35, 217.04                   |
| 84. |  <p><b>Phenylacetic acid</b><br/>C<sub>8</sub>H<sub>8</sub>O<sub>2</sub></p>                                            | 1.41 | 211                 | 137.05965<br>(-0.4)            | 91.92, 136.93<br>90.86, 119.97<br>119.34, 115.92<br>118.29, 124.57                     | 135.04526<br>(+0.8) | 90.88, 134.93<br>107.99, 119.71<br>81.79, 92.88                                        |
| 85. |  <p><b>Decarboxy-citrinone</b><br/>C<sub>12</sub>H<sub>12</sub>O<sub>4</sub></p>                                       | 4.37 | 246,<br>267,<br>339 | 221.08017<br>(-3.0)            | 174.99, 203.01<br>192.99, 220.98<br>164.99, 151.09<br>146.99, 122.99<br>137.01, 179.06 | 219.06602<br>(-1.2) | 219.04, 204.02<br>174.97, 191.01<br>177.02, 201.05<br>148.94, 151.04<br>217.13, 189.02 |

|     |                                                                                                                                                                                              |      |             |                     |                                                                                        |                     |                                                                                        |
|-----|----------------------------------------------------------------------------------------------------------------------------------------------------------------------------------------------|------|-------------|---------------------|----------------------------------------------------------------------------------------|---------------------|----------------------------------------------------------------------------------------|
| 86. | 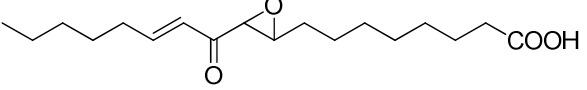 <p><b>(E)-8-(3-(oct-2-enoyl)oxiran-2-yl)octanoic acid</b><br/>C<sub>18</sub>H<sub>30</sub>O<sub>4</sub></p> | 5.52 | 232         | 311.22174<br>(+0.2) | 293.25, 275.16<br>257.17, 265.17<br>110.93, 139.05<br>247.20, 163.05<br>177.02, 197.09 | 309.20663<br>(-1.6) | 291.16, 281.22<br>273.12, 267.18<br>265.30, 263.25<br>247.29, 211.14<br>209.08, 193.03 |
| 87. |  <p><b>(10E,12E)-9-hydroxyoctadeca-10,12-dienoic acid</b><br/>C<sub>18</sub>H<sub>32</sub>O<sub>3</sub></p> | 6.10 | 220         | 297.24216<br>(-0.9) | 282.04, 279.19<br>283.06, 269.36<br>297.29, 280.24<br>251.18, 241.19<br>237.14, 261.21 | 295.22803<br>(+0.5) | 182.98, 277.22<br>155.06, 251.27<br>138.92, 295.22<br>267.21, 233.17<br>137.05, 195.14 |
| 88. |  <p><b>Equisetin</b><br/>C<sub>22</sub>H<sub>31</sub>NO<sub>4</sub></p>                                     | 6.87 | 230,<br>295 | 374.23221<br>(-1.0) | 356.22, 346.27<br>175.10, 170.04<br>200.03, 177.15<br>205.12, 184.02<br>143.98, 231.14 | 372.21686<br>(-0.2) | 342.28, 298.18<br>324.22, 343.37<br>111.87, 123.85<br>314.20, 281.97<br>256.09, 371.94 |
| 89. |  <p><b>5'-epiequisetin</b><br/>C<sub>22</sub>H<sub>31</sub>NO<sub>4</sub></p>                              | 7.01 | 231,<br>296 | 374.23230<br>(-0.8) | 356.24, 346.27<br>175.13, 170.01<br>200.02, 177.11<br>205.13, 184.02<br>143.96, 231.13 | 372.21729<br>(+1.0) | 342.25, 298.29<br>324.29, 343.26<br>112.07, 124.01<br>241.15, 135.95<br>314.30, 230.14 |
| 90. |  <p><b>2,3-dihydroxypropyl stearate</b><br/>C<sub>21</sub>H<sub>42</sub>O<sub>4</sub></p>                 | 8.55 | ND          | 359.31537<br>(-0.6) | 341.36, 267.16<br>313.39, 359.35<br>285.29, 342.06<br>274.89, 331.37<br>303.32, 255.14 | ND                  |                                                                                        |
| 91. |  <p><b>(E)-2,3-dihydroxypropyl octadec-6-enoate</b><br/>C<sub>21</sub>H<sub>40</sub>O<sub>4</sub></p>     | 7.98 | 226         | 357.29962<br>(-0.9) | 339.32, 265.26<br>247.24, 283.17<br>135.08, 149.09<br>120.96, 163.08<br>151.09, 177.07 | ND                  |                                                                                        |



|     |                                                                                                                                                                           |      |                     |                     |                                                                                        |                     |                                                                                        |
|-----|---------------------------------------------------------------------------------------------------------------------------------------------------------------------------|------|---------------------|---------------------|----------------------------------------------------------------------------------------|---------------------|----------------------------------------------------------------------------------------|
| 92. | 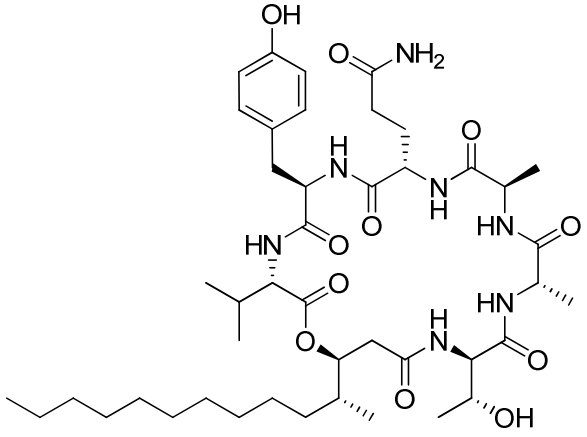 <p><b>Acuminatum C</b><br/>C<sub>44</sub>H<sub>71</sub>N<sub>7</sub>O<sub>11</sub></p>  | 6.13 | 224,<br>276         | 874.52637<br>(-2.4) | 856.60, 551.29<br>857.52, 775.52<br>534.39, 839.51<br>768.23, 434.17<br>757.46, 838.57 | 872.51196<br>(-2.2) | 828.49, 854.69<br>588.47, 549.41<br>674.57, 606.53<br>632.45, 437.49<br>630.24, 829.34 |
| 93. |  <p><b>Acuminatum B</b><br/>C<sub>45</sub>H<sub>73</sub>N<sub>7</sub>O<sub>11</sub></p> | 6.42 | 224,<br>276         | 888.54095<br>(-3.5) | 870.54, 565.30<br>871.56, 775.48<br>548.33, 853.61<br>434.17, 782.39<br>852.78, 757.65 | 886.52802<br>(-1.7) | 842.49, 868.60<br>563.48, 602.36<br>646.45, 620.51<br>688.46, 664.48<br>437.28, 644.22 |
| 94. |  <p><b>Aurofusarin</b><br/>C<sub>30</sub>H<sub>18</sub>O<sub>12</sub></p>              | 4.84 | 243,<br>269,<br>380 | 571.08600<br>(-1.9) | 556.12, 511.15<br>539.15, 557.18<br>541.19, 512.17<br>540.13, 497.18<br>528.18, 524.11 | 569.07257<br>(0.0)  | 523.16, 538.08<br>537.29, 539.13<br>524.01, 554.02<br>509.19, 525.06<br>540.12, 569.14 |

|     |                                                                                                                                                                                    |      |                     |                      |                                                                                            |                      |                                                                                                  |
|-----|------------------------------------------------------------------------------------------------------------------------------------------------------------------------------------|------|---------------------|----------------------|--------------------------------------------------------------------------------------------|----------------------|--------------------------------------------------------------------------------------------------|
| 95. | 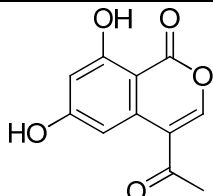 <p><b>AGI-7</b><br/>C<sub>11</sub>H<sub>8</sub>O<sub>5</sub></p>                                  | 3.04 | 230,<br>263,<br>326 | 221.04536<br>(+4.1)  | 178.98, 221.02<br>160.96, 203.04<br>136.92, 150.99<br>175.11, 165.08<br>193.06, 133.06     | 219.02966<br>(-1.1)  | 218.85, 216.95<br>177.01, 174.97<br>191.05, 130.95<br>146.90, 132.97<br>148.87, 172.92           |
| 96. |  <p><b>Clonostachin</b><br/>C<sub>78</sub>H<sub>134</sub>N<sub>14</sub>O<sub>25</sub></p>         | 5.38 | 220                 | 1667.97253<br>(+0.5) | 1612.73, 763.39<br>1650.04, 1583.62<br>1616.32, 1671.57                                    | 1665.95349<br>(-2.2) | 1501.97, 1538.92<br>1374.79, 1483.88<br>1501.33, 1049.60<br>1288.72, 1356.65<br>1161.68, 1502.62 |
| 97. | 01009-91-5*                                                                                                                                                                        | 5.41 | 219                 | 1681.98291<br>(-2.7) | 847.22, 846.48<br>854.06, 848.06<br>845.84, 1403.76<br>1077.69, 1516.99<br>855.21, 1419.15 | 1679.96924<br>(-2.1) | 1516.01, 1515.00<br>1552.42, 1370.88<br>1063.34, 1553.23<br>1372.96, 850.95<br>1388.48, 1374.97  |
| 98. |  <p><b>Sch 52901</b><br/>C<sub>31</sub>H<sub>30</sub>N<sub>6</sub>O<sub>6</sub>S<sub>4</sub></p> | 5.75 | 209,<br>300         | 711.11609<br>(-3.0)  | 629.17, 647.13<br>646.52, 383.22<br>397.25, 465.13<br>233.16, 479.12<br>565.21, 232.11     | 709.10400<br>(+0.4)  | 645.00, 610.97<br>579.24, 613.26<br>643.15, 554.17<br>508.90, 577.26<br>461.20, 463.31           |

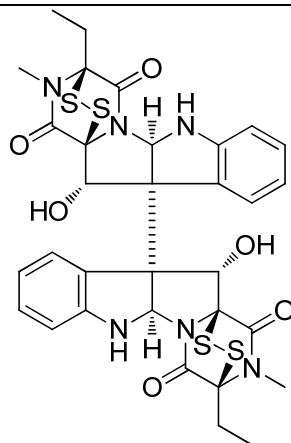

**Verticillin H**

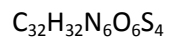

99.

6.02

211,  
302

725.13208  
(-2.5)

643.09, 661.02  
397.26, 415.10  
479.22, 579.36  
233.05, 232.12  
298.20, 478.50

723.11993  
(+0.8)

659.17, 658.53  
657.04, 625.13  
477.09, 411.16  
593.07, 595.43  
526.08, 568.45

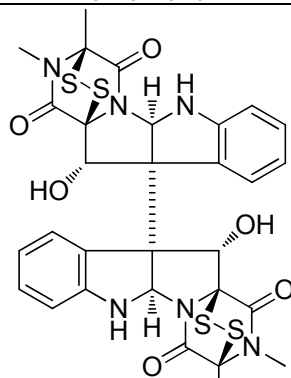

**Verticillin A**

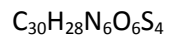

100.

5.45

217,  
298

697.10156  
(-1.5)

615.16, 633.01  
383.18, 465.23  
233.09, 401.22  
632.28, 551.25  
284.13, 232.11

695.08771  
(-0.5)

631.12, 597.10  
565.19, 599.19  
660.91, 495.01  
463.07, 598.58  
629.20, 446.96

|      |                                                                                                                                                                                            |      |             |                     |                                                                                        |                     |                                                                                        |
|------|--------------------------------------------------------------------------------------------------------------------------------------------------------------------------------------------|------|-------------|---------------------|----------------------------------------------------------------------------------------|---------------------|----------------------------------------------------------------------------------------|
| 101. | 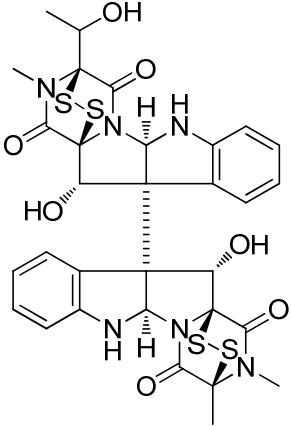 <p><b>Sch 52900</b><br/>C<sub>31</sub>H<sub>30</sub>N<sub>6</sub>O<sub>7</sub>S<sub>4</sub></p>           | 5.19 | 213,<br>300 | 727.11115<br>(-2.3) | 645.10, 663.10<br>413.23, 266.14<br>383.22, 495.16<br>662.42, 465.08<br>296.16, 233.14 | 725.09814<br>(-0.6) | 661.01, 583.16<br>597.09, 647.07<br>661.98, 627.14<br>643.08, 595.24<br>617.16, 659.21 |
| 102. |  <p><b>Gliocladicillin A</b><br/>C<sub>31</sub>H<sub>30</sub>N<sub>6</sub>O<sub>5</sub>S<sub>4</sub></p> | 5.41 | 206,<br>298 | 695.12158<br>(-2.5) | 629.09, 631.15<br>479.00, 630.31<br>397.18, 280.08<br>268.17, 233.13<br>613.17, 384.25 | 693.10822<br>(-0.8) | 629.06, 595.23<br>627.06, 563.30<br>461.24, 446.95<br>561.35, 381.23<br>597.05, 395.14 |

|      |                                                                                                                                                                                                |      |                     |                     |                                                                                        |                     |                                                                                        |
|------|------------------------------------------------------------------------------------------------------------------------------------------------------------------------------------------------|------|---------------------|---------------------|----------------------------------------------------------------------------------------|---------------------|----------------------------------------------------------------------------------------|
| 103. | 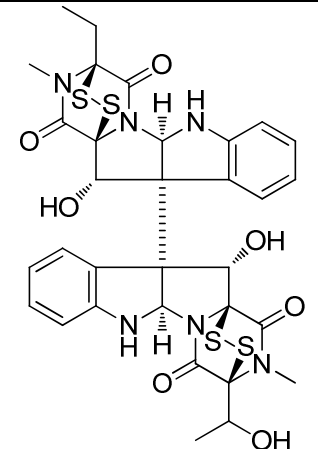 <p><b>Gliocladicillin C</b><br/>C<sub>32</sub>H<sub>32</sub>N<sub>6</sub>O<sub>7</sub>S<sub>4</sub></p>       | 5.54 | 207<br>298          | 741.12683<br>(-2.7) | 659.16, 677.04<br>413.26, 280.16<br>495.12, 676.40<br>397.31, 296.16<br>479.00, 233.06 | 739.11279<br>(-2.0) | 675.09, 597.19<br>611.07, 643.21<br>657.26, 660.95<br>567.21, 631.23<br>675.94, 565.26 |
| 104. |  <p><b>11-Deoxyverticillin A</b><br/>C<sub>30</sub>H<sub>28</sub>N<sub>6</sub>O<sub>5</sub>S<sub>4</sub></p> | 5.12 | 215,<br>298         | 681.10596<br>(-2.5) | 615.11, 465.02<br>617.22, 383.22<br>616.30, 233.12<br>268.15, 266.10<br>384.23, 385.23 | 679.09326<br>(+0.2) | 615.00, 581.10<br>613.06, 547.10<br>446.93, 381.31<br>549.33, 583.11<br>644.81, 587.84 |
| 105. |  <p><b>De-O-methyldihydrosterigmatocystin</b><br/>C<sub>17</sub>H<sub>12</sub>O<sub>6</sub></p>             | 5.92 | 230,<br>248,<br>333 | 313.06998<br>(-2.2) | 285.11, 313.09<br>257.04, 286.19<br>295.12, 243.11<br>284.25, 202.99<br>269.09, 258.10 | 311.05634<br>(+0.7) | 311.04, 282.99<br>312.16, 283.99<br>255.04, 242.89<br>281.13, 182.99<br>293.00, 255.99 |

|      |                                                                                                                                                              |      |                                     |                     |                                                                                        |                     |                                                                                        |
|------|--------------------------------------------------------------------------------------------------------------------------------------------------------------|------|-------------------------------------|---------------------|----------------------------------------------------------------------------------------|---------------------|----------------------------------------------------------------------------------------|
| 106. | 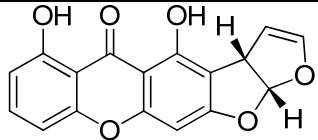 <p><b>Sterigmatin</b><br/>C<sub>17</sub>H<sub>10</sub>O<sub>6</sub></p>     | 6.22 | 224,<br>250,<br>322                 | 311.05511<br>(+0.3) | 283.10, 255.19<br>269.07, 284.12<br>293.25, 265.07<br>311.18, 241.14<br>267.13, 292.57 | 309.03961<br>(-2.8) | 309.19, 264.94<br>281.12, 282.02<br>240.83, 96.92<br>248.11, 280.47<br>266.22, 262.77  |
| 107. |  <p><b>Averufin</b><br/>C<sub>20</sub>H<sub>16</sub>O<sub>7</sub></p>       | 6.35 | 222,<br>267,<br>293,<br>321,<br>450 | 369.09604<br>(-2.3) | 351.11, 311.09<br>299.12, 327.09<br>285.09, 309.11<br>333.12, 273.03<br>323.12, 369.12 | 367.08197<br>(-1.0) | 367.05, 284.08<br>295.14, 285.15<br>368.25, 297.13<br>282.98, 310.08<br>296.05, 308.97 |
| 108. |  <p><b>Roridin A</b><br/>C<sub>29</sub>H<sub>40</sub>O<sub>9</sub></p>      | 4.46 | 224,<br>263                         | 533.27319<br>(-2.5) | 249.09, 231.12<br>333.22, 403.01<br>385.10, 213.17<br>185.06, 195.03<br>203.15, 247.10 | 531.26093<br>(+1.8) | 401.39, 513.39<br>487.27, 371.34<br>469.34, 365.20<br>357.21, 501.45<br>237.16, 265.19 |
| 109. |  <p><b>Roridin D</b><br/>C<sub>29</sub>H<sub>38</sub>O<sub>9</sub></p>     | 4.81 | 224,<br>259                         | 531.25763<br>(-2.3) | 249.10, 231.21<br>485.27, 403.03<br>185.11, 213.12<br>347.20, 203.13<br>195.18, 331.22 | 529.24548<br>(+2.2) | 263.12, 485.19<br>511.27, 501.29<br>235.14, 441.26<br>374.94 163.04<br>237.13, 219.17  |
| 110. |  <p><b>Virgineone</b><br/>C<sub>40</sub>H<sub>63</sub>NO<sub>12</sub></p> | 5.41 | 222,<br>280                         | 750.44183<br>(-0.6) | 588.47, 570.44<br>732.39, 552.64<br>678.38, 612.61<br>714.36, 552.04<br>540.43, 696.54 | 748.42511<br>(-3.5) | 642.41, 686.41<br>643.53, 480.41<br>586.45, 687.58<br>524.39, 436.45<br>654.46, 506.58 |

|      |                                                                                                                                         |      |                             |                     |                                                                                        |                     |                                                                                        |
|------|-----------------------------------------------------------------------------------------------------------------------------------------|------|-----------------------------|---------------------|----------------------------------------------------------------------------------------|---------------------|----------------------------------------------------------------------------------------|
| 111. | 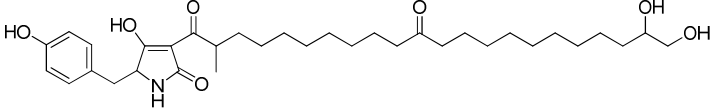<br><b>Virgineone aglycone</b><br>$C_{34}H_{53}NO_7$    | 6.10 | 224,<br>280                 | 588.38794<br>(-2.6) | 570.49, 552.40<br>206.11, 534.43<br>540.50, 337.39<br>464.45, 400.34<br>440.50, 365.43 | 586.37305<br>(-3.2) | 480.44, 481.53<br>524.51, 436.42<br>492.60, 542.61<br>204.02, 406.33<br>418.22, 525.65 |
| 112. | 01009-74-3*                                                                                                                             | 5.91 | 226,<br>293,<br>374         |                     | 586.43, 568.38<br>730.27, 550.52<br>676.40, 694.46<br>587.13, 365.34<br>538.43, 712.76 |                     | 584.35, 585.45<br>746.57, 540.39<br>566.52, 626.47<br>522.53, 702.54<br>703.57, 541.48 |
| 113. | <br><b>5,6-dihydroxybisabolol</b><br>$C_{15}H_{28}O_3$ | 3.73 | 220,<br>281                 | 257.21182<br>(+2.7) | 221.12, 239.09<br>203.11, 127.02<br>118.97, 133.05<br>108.98, 147.03<br>149.07, 240.04 | 255.19684<br>(+1.1) | 211.18, 237.25<br>159.01, 136.96<br>227.97, 81.03<br>212.60, 201.22<br>219.13, 208.92  |
| 114. | 01007-150-1*                                                                                                                            | 5.24 | 232,<br>257,<br>293,<br>372 | 287.09180<br>(+1.4) | 269.12, 272.07<br>254.07, 259.15<br>287.16, 257.09<br>258.13, 226.08<br>267.11, 270.00 | 285.07736<br>(+1.8) | 255.15, 284.98<br>270.11, 240.97<br>257.04, 225.02<br>239.92, 270.98<br>196.83, 242.03 |
| 115. | 01007-150-3 (01008-93-2)*                                                                                                               | 6.39 | 228,<br>259,<br>287,<br>380 | 257.08112<br>(+1.1) | 257.09, 242.02<br>214.11, 243.05<br>258.11, 225.04<br>226.14, 227.13<br>213.25, 215.06 | ND                  | ND                                                                                     |
| 116. | 01007-150-4*                                                                                                                            | 6.77 | 232,<br>254,<br>289,<br>369 | 271.09628<br>(-0.8) | 256.08, 271.10<br>239.04, 228.10<br>257.10, 241.11<br>240.07, 272.22<br>227.25, 212.95 | ND                  | ND                                                                                     |
| 117. | <br><b>Betulinan A</b><br>$C_{20}H_{16}O_4$          | 5.52 | 224,<br>265,<br>324         | 321.11212<br>(0.0)  | 289.26, 306.11<br>293.15, 274.21<br>258.08, 271.11<br>290.17, 261.22<br>259.18, 233.11 | 319.09845<br>(+2.7) | 304.00, 291.10<br>276.01, 319.20<br>287.20, 289.18<br>247.08, 292.07<br>277.13, 231.27 |

|      |                                                                                                                                                                        |      |                     |                     |                                                                                        |                     |                                                                                        |
|------|------------------------------------------------------------------------------------------------------------------------------------------------------------------------|------|---------------------|---------------------|----------------------------------------------------------------------------------------|---------------------|----------------------------------------------------------------------------------------|
| 118. | 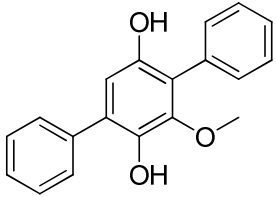 <p><b>BTH-II0204-207:A</b><br/>C<sub>19</sub>H<sub>16</sub>O<sub>3</sub></p>          | 4.87 | 224,<br>259,<br>311 | 293.11716<br>(-0.2) | 261.16, 278.08<br>277.13, 275.16<br>292.20, 233.18<br>262.12, 243.12<br>259.20, 232.11 | 291.10327<br>(+2.1) | 276.05, 263.00<br>291.00, 173.00<br>275.09, 219.09<br>247.18, 273.11<br>264.07, 249.12 |
| 119. |  <p><b>Betulinan C</b><br/>C<sub>19</sub>H<sub>14</sub>O<sub>3</sub></p>              | 5.64 | 226,<br>259,<br>337 | 291.10175<br>(+0.6) | 276.06, 259.08<br>260.10, 231.11<br>273.09, 213.08<br>263.08, 258.09<br>245.16, 291.16 | 289.08813<br>(+3.8) | 289.07, 261.03<br>275.06, 260.11<br>288.20, 245.03<br>271.15, 287.09<br>262.00, 259.09 |
| 120. | 01008-147-2*                                                                                                                                                           | 3.56 | 220                 | 239.12782<br>(+0.1) | 221.04, 195.16<br>154.93, 183.07<br>203.06, 132.98<br>137.01, 193.14<br>164.96, 177.12 | 237.11336<br>(+0.5) | 181.06, 237.22<br>219.15, 123.06<br>174.97, 152.93<br>146.84, 146.04<br>137.01, 192.98 |
| 121. |  <p><b>6,9-Octadecadienoic acid</b><br/>C<sub>18</sub>H<sub>32</sub>O<sub>2</sub></p> | 7.25 |                     | 281.24756<br>(+0.2) | 263.21, 264.23<br>246.28, 245.18<br>148.84, 151.06<br>120.97, 135.15<br>221.24, 163.15 | ND                  | ND                                                                                     |
| 122. |  <p><b>Cytochalasin C</b><br/>C<sub>30</sub>H<sub>37</sub>NO<sub>6</sub></p>         | 4.83 | 219,<br>283         | 508.26840<br>(-1.9) | 430.32, 490.16<br>448.38, 412.30<br>388.37, 406.40<br>472.20, 402.26<br>466.27, 370.55 | 506.25427<br>(-1.1) | 446.26, 488.23<br>241.16, 428.18<br>460.29, 464.51<br>418.24, 436.11<br>403.32, 291.21 |



|      |                                                                                                                                                                            |      |                             |                     |                                                                                        |                     |                                                                                        |
|------|----------------------------------------------------------------------------------------------------------------------------------------------------------------------------|------|-----------------------------|---------------------|----------------------------------------------------------------------------------------|---------------------|----------------------------------------------------------------------------------------|
| 123. | 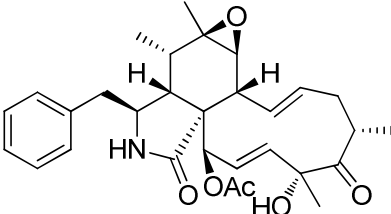 <p><b>Cytochalasin Q<sub>HYP</sub></b><br/>C<sub>30</sub>H<sub>37</sub>NO<sub>6</sub></p> | 5.00 | 213,<br>285                 | 508.26831<br>(-2.1) | 490.20, 430.31<br>448.26, 412.26<br>402.36, 388.40<br>406.31, 394.32<br>384.27, 374.42 | 506.25439<br>(-0.8) | 446.28, 464.46<br>488.25, 428.27<br>463.70, 385.33<br>388.33, 436.35<br>354.36, 418.37 |
| 124. |  <p><b>8-Acetoxyneosolaniol</b><br/>C<sub>21</sub>H<sub>28</sub>O<sub>9</sub></p>         | 3.28 | 226                         | 425.18039<br>(-0.5) | 305.18, 215.13<br>245.03, 263.05<br>173.12, 365.33<br>199.07, 191.08<br>227.17, 169.12 | ND                  | ND                                                                                     |
| 125. |  <p><b>Isonesosolaniol</b><br/>C<sub>19</sub>H<sub>26</sub>O<sub>8</sub></p>              | 2.42 | 219                         | 383.16956<br>(-1.3) | 263.11, 323.10<br>245.14, 305.09<br>365.11, 227.08<br>199.07, 287.15<br>215.07, 217.11 | ND                  | ND                                                                                     |
| 126. |  <p><b>Abscisic acid</b><br/>C<sub>15</sub>H<sub>20</sub>O<sub>4</sub></p>              | 3.16 | 222,<br>263                 | 265.14374<br>(+1.1) | 247.07, 229.09<br>219.14, 209.10<br>201.16, 205.09<br>187.18, 163.07<br>203.11, 185.15 | 263.12872<br>(-0.6) | 152.92, 219.08<br>204.05, 201.09<br>110.91, 161.04<br>245.06, 186.10<br>138.14, 137.38 |
| 127. |  <p><b>5-Methoxysterigmatocystin</b><br/>C<sub>19</sub>H<sub>14</sub>O<sub>7</sub></p>  | 4.84 | 230,<br>244,<br>274,<br>330 | 355.08124<br>(0.0)  | 340.09, 327.16<br>325.07, 341.19<br>355.17, 312.12<br>311.19, 326.09<br>328.18, 297.10 | 353.06625<br>(-1.2) | 338.04, 325.12<br>257.01, 307.33<br>308.88, 353.36<br>285.03, 339.18<br>262.81, 269.23 |

|      |                                                                                                                                                                           |      |                             |                     |                                                                                        |                     |                                                                                        |
|------|---------------------------------------------------------------------------------------------------------------------------------------------------------------------------|------|-----------------------------|---------------------|----------------------------------------------------------------------------------------|---------------------|----------------------------------------------------------------------------------------|
| 128. | 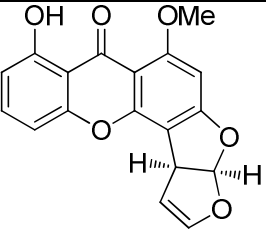 <p><b>Sterigmatocystin</b><br/>C<sub>18</sub>H<sub>12</sub>O<sub>6</sub></p>             | 5.03 | 232,<br>244,<br>326         | 325.07071<br>(+0.1) | 310.11, 297.13<br>325.10, 311.13<br>282.12, 281.08<br>293.10, 296.09<br>298.15, 283.12 | 323.05594<br>(-0.5) | 323.18, 308.18<br>294.99, 323.96<br>276.69, 305.33<br>280.00, 252.45<br>309.09, 278.90 |
| 129. |  <p><b>Aversin</b><br/>C<sub>20</sub>H<sub>16</sub>O<sub>7</sub></p>                     | 5.21 | 222,<br>285,<br>315,<br>441 | 369.09662<br>(-0.7) | 351.16, 341.13<br>339.15, 340.17<br>313.13, 352.18<br>323.19, 369.13<br>327.14, 354.13 | 367.08228<br>(-0.1) | 337.10, 339.15<br>338.08, 352.05<br>353.22, 349.14<br>292.85, 323.30<br>367.09, 329.15 |
| 130. |  <p><b>Brevianamide P</b><br/>C<sub>22</sub>H<sub>23</sub>N<sub>3</sub>O<sub>3</sub></p> | 4.92 | 224,<br>287,<br>443         | 378.18057<br>(-1.7) | 231.11, 361.21<br>322.18, 321.15<br>360.22, 287.19<br>350.28, 243.16<br>248.11, 230.11 | 376.16626<br>(-1.1) | 285.07, 284.07<br>319.09, 229.11<br>256.19, 188.01<br>160.86, 227.98<br>244.21, 333.16 |
| 131. |  <p><b>6,8-Di-O-Methyl averufin</b><br/>C<sub>22</sub>H<sub>20</sub>O<sub>7</sub></p>   | 6.55 | 224,<br>287,<br>443         | 397.12772<br>(-1.2) | 339.17, 379.18<br>313.13, 327.14<br>355.17, 337.07<br>361.25, 301.22<br>351.22, 380.22 | 395.11386<br>(+0.6) | 311.92, 297.02<br>395.27, 377.22<br>313.05, 327.12<br>323.12, 309.09<br>337.02, 291.47 |

|      |                                                                                                                                                                            |      |             |                     |                                                                                        |                     |                                                                                        |
|------|----------------------------------------------------------------------------------------------------------------------------------------------------------------------------|------|-------------|---------------------|----------------------------------------------------------------------------------------|---------------------|----------------------------------------------------------------------------------------|
| 132. | 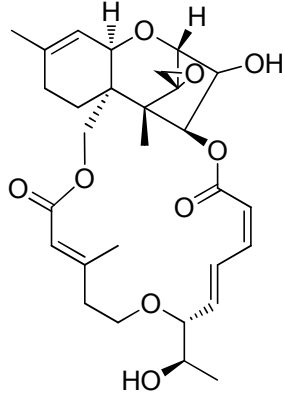 <p><b>Roridin L</b><br/>C<sub>29</sub>H<sub>38</sub>O<sub>9</sub></p>                     | 4.37 | 222,<br>259 | 531.25781<br>(-2.0) | 377.25, 513.22<br>359.34, 401.21<br>247.10, 229.15<br>265.19, 383.30<br>395.21, 495.36 | 529.24420<br>(-0.2) | 375.26, 485.37<br>401.04, 247.14<br>417.35, 511.32<br>451.09, 265.12<br>499.05, 233.32 |
| 133. |  <p><b>Verrucarins J, Muconomycin B</b><br/>C<sub>27</sub>H<sub>32</sub>O<sub>8</sub></p> | 5.53 | 222,<br>261 | 485.21613<br>(-1.8) | 343.25, 231.12<br>373.25, 213.20<br>249.17, 185.05<br>201.07, 187.11<br>203.13, 159.01 | 483.20267<br>(+0.5) | 389.21, 439.15<br>173.09, 465.21<br>235.05, 395.32<br>160.81, 373.07<br>211.28, 254.99 |
| 134. |  <p><b>Roridin H; Verrucarins H</b><br/>C<sub>29</sub>H<sub>36</sub>O<sub>8</sub></p>    | 6.07 | 224,<br>259 | 513.24719<br>(-2.2) | 231.12, 359.22<br>249.15, 213.20<br>201.12, 495.19<br>182.76, 203.18<br>185.10, 331.23 | ND                  | ND                                                                                     |

|      |                                                                                                                                                                          |      |                     |                     |                                                                                        |                     |                                                                                        |
|------|--------------------------------------------------------------------------------------------------------------------------------------------------------------------------|------|---------------------|---------------------|----------------------------------------------------------------------------------------|---------------------|----------------------------------------------------------------------------------------|
| 135. | 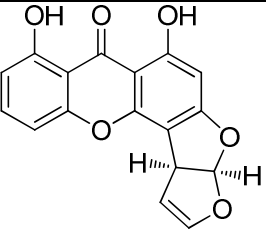 <p><b>De-O-methylsterigmatocystin</b><br/>C<sub>17</sub>H<sub>10</sub>O<sub>6</sub></p> | 6.03 | 228,<br>248,<br>333 | 311.05505<br>(+0.1) | 283.07, 311.11<br>282.10, 284.20<br>269.01, 255.03<br>241.04, 200.97<br>264.02, 312.15 | 309.04068<br>(+0.7) | 309.14, 265.07<br>281.18, 240.94<br>266.10, 263.12<br>96.88, 290.17<br>156.71, 172.94  |
| 136. |  <p><b>Zygosporin G</b><br/>C<sub>30</sub>H<sub>37</sub>NO<sub>5</sub></p>              | 5.93 | 217,<br>276         | 492.27356<br>(-1.8) | 474.18, 414.34<br>396.30, 432.33<br>267.19, 249.30<br>372.32, 386.41<br>322.32, 390.41 | 490.26102<br>(+2.3) | 444.37, 472.40<br>462.36, 446.30<br>315.53, 307.06<br>428.46, 460.32<br>399.45, 193.24 |
| 137. |  <p><b>Versimide</b><br/>C<sub>9</sub>H<sub>11</sub>NO<sub>4</sub></p>                  | 1.65 | 214                 | 198.07603<br>(-0.3) | 165.95, 198.10<br>96.98, 82.96<br>80.90, 95.01<br>68.91, 92.98<br>106.95, 121.02       | ND                  | ND                                                                                     |
| 138. |  <p><b>Aigialomycin A</b><br/>C<sub>19</sub>H<sub>22</sub>O<sub>8</sub></p>            | 3.77 | 232,<br>263,<br>304 | 379.13791<br>(-2.2) | 253.00, 235.00<br>343.25, 361.09<br>325.15, 231.00<br>265.00, 206.98<br>249.05, 126.98 | 377.12354<br>(-1.7) | 251.01, 359.09<br>207.03, 305.07<br>341.21, 178.98<br>233.12, 315.16<br>205.06, 263.06 |
| 139. |  <p><b>Nidulalin B</b><br/>C<sub>16</sub>H<sub>14</sub>O<sub>6</sub></p>              | 3.60 | 222,<br>276         | 303.08591<br>(-1.3) | 192.95, 271.13<br>178.99, 136.86<br>167.09, 179.59<br>193.75, 286.30<br>88.99, 109.03  | 301.07086<br>(-3.0) | 268.99, 283.08<br>134.84, 225.04<br>257.20, 241.05<br>91.00, 108.87<br>165.03, 269.74  |

|      |                                                                                                                                                                    |      |                     |                     |                                                                                        |                     |                                                                                        |
|------|--------------------------------------------------------------------------------------------------------------------------------------------------------------------|------|---------------------|---------------------|----------------------------------------------------------------------------------------|---------------------|----------------------------------------------------------------------------------------|
| 140. | 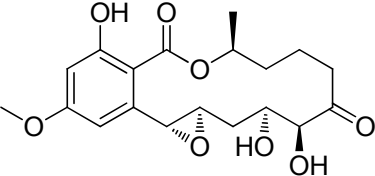 <p><b>Dihydrohypothemycin</b><br/>C<sub>19</sub>H<sub>24</sub>O<sub>8</sub></p>   | 4.01 | 219,<br>265,<br>304 | 381.15338<br>(-2.7) | 363.12, 345.18<br>327.12, 303.13<br>253.00, 265.09<br>309.24, 249.15<br>285.11, 235.02 | 379.13925<br>(-1.6) | 178.94, 307.11<br>233.05, 361.05<br>277.12, 163.98<br>180.96, 343.13<br>205.03, 335.13 |
| 141. | 01020-76-1*                                                                                                                                                        | 4.16 | 222,<br>272,<br>350 | 321.09613<br>(-2.3) | 261.04, 303.11<br>289.09, 219.00<br>247.06, 271.11<br>192.95, 149.02<br>275.17, 136.98 | 319.08191<br>(-1.3) | 275.18, 243.22<br>287.23, 257.09<br>205.13, 300.92<br>162.74, 219.88<br>215.03, 220.99 |
| 142. |  <p><b>Pyrenochaetic acid C</b><br/>C<sub>13</sub>H<sub>16</sub>O<sub>4</sub></p> | 4.40 | 217,<br>250,<br>304 | 237.1185<br>(-1.2)  | 219.08, 175.09<br>194.05, 195.10<br>236.06, 200.99<br>192.95, 161.95<br>160.01, 177.05 | 235.09740<br>(-0.8) | 191.00, 176.06<br>235.09, 163.18<br>120.96, 191.60<br>177.23, 207.15<br>179.11, 68.98  |
| 143. |  <p><b>Secalonic acid A</b><br/>C<sub>32</sub>H<sub>30</sub>O<sub>14</sub></p>   | 5.26 | 222,<br>263,<br>337 | 639.16882<br>(-2.8) | 561.27, 589.16<br>579.27, 621.25<br>501.27, 571.27<br>455.21, 543.17<br>603.28, 511.28 | 637.15448<br>(-2.8) | 577.30, 619.24<br>543.19, 417.23<br>605.23, 559.11<br>587.15, 541.34<br>593.29, 499.24 |

|      |                                                                                                                                                                     |      |                     |                     |                                                                                        |                     |                                                                                        |
|------|---------------------------------------------------------------------------------------------------------------------------------------------------------------------|------|---------------------|---------------------|----------------------------------------------------------------------------------------|---------------------|----------------------------------------------------------------------------------------|
| 144. | 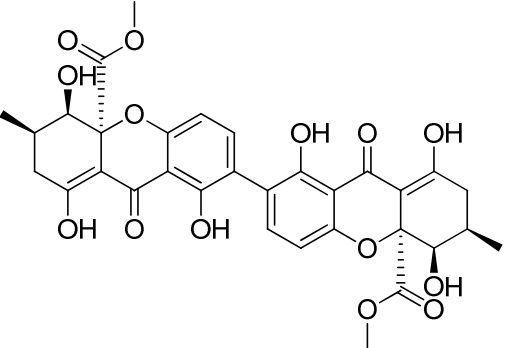 <p><b>Secalonic acid E</b><br/>C<sub>32</sub>H<sub>30</sub>O<sub>14</sub></p>      | 5.50 | 220,<br>265,<br>337 | 639.16913<br>(-2.7) | 561.24, 589.26<br>579.26, 621.20<br>455.31, 571.26<br>501.19, 603.25<br>543.35, 607.30 | 637.15381<br>(-3.1) | 593.25, 543.30<br>605.30, 619.19<br>549.29, 577.20<br>561.22, 499.29<br>575.37, 587.15 |
| 145. |  <p><b>Secalonic acid G</b><br/>C<sub>32</sub>H<sub>30</sub>O<sub>14</sub></p>     | 5.39 | 220,<br>259,<br>337 | 639.16925<br>(-2.5) | 561.28, 589.23<br>579.24, 621.23<br>571.22, 455.32<br>501.28, 543.20<br>603.35, 511.28 | 637.15417<br>(-3.3) | 577.20, 593.13<br>543.19, 619.21<br>605.25, 561.31<br>499.29, 587.18<br>533.24, 525.23 |
| 146. |  <p><b>Penicillixanthone A</b><br/>C<sub>32</sub>H<sub>30</sub>O<sub>14</sub></p> | 5.90 | 220,<br>262,<br>335 | 639.16943<br>(-2.2) | 621.23, 589.24<br>579.26, 561.24<br>571.32, 603.37<br>501.40, 543.14<br>589.94, 455.33 | 637.15424<br>(-3.2) | 605.18, 577.26<br>619.12, 593.22<br>543.15, 561.36<br>587.20, 557.20<br>551.21, 525.24 |
| 147. | 01020-138-1*                                                                                                                                                        | 5.29 | 220,<br>259,<br>335 | 639.16907<br>(-2.8) | 561.23, 589.24<br>579.27, 571.24<br>501.21, 455.22<br>621.23, 565.29<br>547.35, 193.01 | 637.15411<br>(-3.4) | 593.19, 561.21<br>543.33, 549.29<br>517.20, 365.25<br>577.19, 605.35<br>533.21, 575.22 |

|      |                                                                                                                                                                                                                                  |      |             |                     |                                                                                        |                     |                                                                                        |
|------|----------------------------------------------------------------------------------------------------------------------------------------------------------------------------------------------------------------------------------|------|-------------|---------------------|----------------------------------------------------------------------------------------|---------------------|----------------------------------------------------------------------------------------|
| 148. | 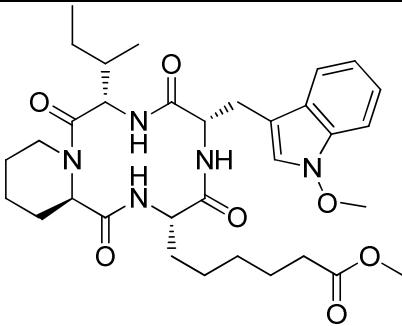 <p><b>New Natural Product, reported by synthesis</b><br/>01020-71-4/ 01009-145-5<br/>C<sub>33</sub>H<sub>47</sub>N<sub>5</sub>O<sub>7</sub></p> | 5.29 | 222,<br>289 | 626.35333<br>(-2.4) | 466.26, 594.46<br>595.36, 513.32<br>598.38, 422.31<br>483.37, 296.13<br>596.38, 297.22 | 624.33868<br>(-2.6) | 464.24, 594.42<br>465.41, 592.44<br>477.23, 254.21<br>562.46, 225.21<br>595.04, 340.21 |
| 149. |  <p><b>Apicidin</b><br/>C<sub>34</sub>H<sub>49</sub>N<sub>5</sub>O<sub>6</sub></p>                                                              | 5.44 | 222,<br>287 | 624.37372<br>(-2.9) | 464.24, 592.44<br>593.37, 511.36<br>294.20, 596.46<br>420.28, 481.33<br>467.17, 594.47 | 622.35925<br>(-2.8) | 462.32, 592.46<br>463.44, 475.22<br>590.57, 223.01<br>252.07, 336.32<br>310.22, 183.04 |
| 150. |  <p><b>(8R*,9R*,10S*,6Z)-trihydroxyoctadec-6-enoic acid<br/>(Oxylipin)</b><br/>C<sub>18</sub>H<sub>34</sub>O<sub>5</sub></p>                   | 4.32 | 220         | 331.24762<br>(-0.8) | 313.39, 285.40<br>289.27, 331.25<br>316.26, 302.98<br>295.33, 281.01<br>275.39, 206.99 | 329.23221<br>(-3.5) | 311.34, 211.15<br>199.04, 293.17<br>168.92, 181.11<br>275.24, 192.98<br>227.16, 197.11 |
| 151. |  <p><b>19,20-Epoxycytochalasin D</b><br/>C<sub>30</sub>H<sub>37</sub>NO<sub>7</sub></p>                                                       | 4.03 | 217         | 524.26367<br>(-1.2) | 428.30, 446.23<br>464.30, 404.28<br>386.33, 390.29<br>410.32, 400.32<br>368.28, 239.12 | 522.24884<br>(-1.7) | 480.38, 504.22<br>462.32, 444.23<br>268.27, 422.25<br>324.37, 404.32<br>348.24, 266.16 |

|      |                                                                                                                                                                                     |      |                     |                     |                                                                                        |                     |                                                                                        |
|------|-------------------------------------------------------------------------------------------------------------------------------------------------------------------------------------|------|---------------------|---------------------|----------------------------------------------------------------------------------------|---------------------|----------------------------------------------------------------------------------------|
| 152. | 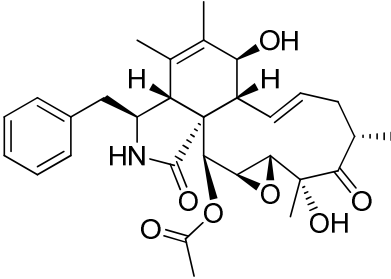 <p><b>19,20-Epoxychoylochalasin C</b><br/>C<sub>30</sub>H<sub>37</sub>NO<sub>7</sub></p>           | 4.54 | 215                 | 524.26343<br>(-1.6) | 428.30, 446.30<br>386.29, 464.25<br>404.26, 390.32<br>400.34, 418.30<br>410.25, 281.14 | 522.24902<br>(-1.4) | 404.24, 462.32<br>480.42, 362.32<br>504.24, 402.28<br>401.22, 444.17<br>464.29, 360.29 |
| 153. |  <p><b>18-Deoxy-19,20-epoxychoylochalasin Q</b><br/>C<sub>30</sub>H<sub>37</sub>NO<sub>6</sub></p> | 5.18 | 211                 | 508.26831<br>(-2.1) | 430.29, 412.35<br>402.31, 448.33<br>265.17, 267.14<br>384.31, 346.18<br>374.38, 372.29 | 506.25424<br>(-1.1) | 460.19, 446.19<br>428.34, 464.37<br>478.00, 308.28<br>307.25, 318.08<br>423.13, 436.18 |
| 154. |  <p><b>Trichodermol</b><br/>C<sub>15</sub>H<sub>22</sub>O<sub>3</sub></p>                          | 3.22 | 230                 | 251.16420<br>(+0.1) | 233.12, 215.07<br>187.20, 205.14<br>197.13, 108.95<br>136.92, 158.98<br>95.03, 173.13  | ND                  | ND                                                                                     |
| 155. |  <p><b>Decaspirone C</b><br/>C<sub>20</sub>H<sub>18</sub>O<sub>5</sub></p>                       | 4.45 | 230,<br>298,<br>326 | 339.12225<br>(-1.3) | 321.14, 285.07<br>303.15, 159.00<br>143.95, 159.98<br>144.97, 253.07<br>130.91, 321.77 | 337.10757<br>(-1.7) | 319.04, 293.17<br>159.10, 275.04<br>291.20, 234.95<br>251.17, 337.01<br>263.02, 158.02 |



|      |                                                                                                                                                                             |      |                     |                     |                                                                                        |                     |                                                                                        |
|------|-----------------------------------------------------------------------------------------------------------------------------------------------------------------------------|------|---------------------|---------------------|----------------------------------------------------------------------------------------|---------------------|----------------------------------------------------------------------------------------|
| 156. | 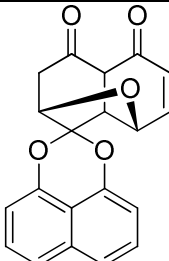 <p><b>Palmarumycin CP3</b><br/>C<sub>20</sub>H<sub>14</sub>O<sub>5</sub></p>               | 5.07 | 226,<br>298,<br>326 | 335.09125<br>(-0.4) | 307.14, 289.14<br>174.98, 161.01<br>279.15, 158.95<br>175.99, 317.08<br>147.05, 160.01 | 333.07599<br>(-2.6) | 158.94, 289.03<br>305.06, 315.18<br>271.08, 303.16<br>157.92, 261.16<br>287.08, 146.96 |
| 157. |  <p><b>Palmarumycin CP4</b><br/>C<sub>20</sub>H<sub>16</sub>O<sub>5</sub></p>              | 5.36 | 224,<br>298,<br>326 | 337.10684<br>(-0.6) | 319.17, 158.98<br>301.14, 160.00<br>130.97, 253.11<br>161.09, 291.12<br>174.96, 277.25 | 335.09201<br>(-1.5) | 158.91, 251.16<br>291.13, 157.87<br>307.14, 317.08<br>273.05, 250.06<br>233.04, 289.05 |
| 158. |  <p><b>Palmarumycin CP<sub>17</sub></b><br/>C<sub>20</sub>H<sub>14</sub>O<sub>5</sub></p> | 5.80 | 228,<br>298,<br>365 | 335.09103<br>(-1.1) | 303.15, 158.94<br>285.10, 174.94<br>161.03, 176.00<br>317.07, 143.97<br>160.05, 275.12 | 333.07639<br>(-1.4) | 159.06, 265.15<br>315.24, 289.01<br>158.42, 333.13<br>189.95, 312.96<br>178.00, 286.94 |
| 159. |  <p><b>Palmarumycin CP<sub>2</sub></b><br/>C<sub>20</sub>H<sub>14</sub>O<sub>4</sub></p> | 5.03 | 222,<br>331         | 319.09598<br>(-1.6) | 159.93, 301.14<br>158.96, 160.96<br>174.92, 302.12<br>130.99, 273.08<br>145.01, 132.92 | 317.08142<br>(-1.6) | 158.89, 174.96<br>299.12, 316.98<br>298.30, 172.97<br>159.95, 173.99<br>273.18, 316.09 |

|      |                                                                                                                                                                                                     |      |                             |                     |                                                                                        |                     |                                                                                        |
|------|-----------------------------------------------------------------------------------------------------------------------------------------------------------------------------------------------------|------|-----------------------------|---------------------|----------------------------------------------------------------------------------------|---------------------|----------------------------------------------------------------------------------------|
| 160. | 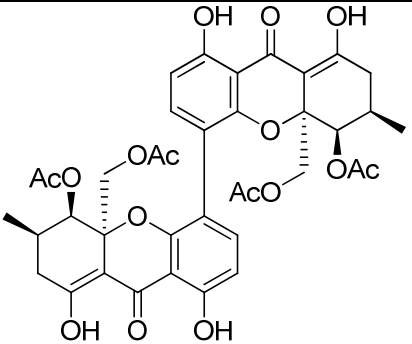 <p><b>Phomoxanthone A</b><br/>C<sub>38</sub>H<sub>38</sub>O<sub>16</sub></p>                                       | 6.56 | 220,<br>254,<br>333         | 751.22235<br>(-1.2) | 673.16, 691.17<br>631.35, 733.04<br>613.31, 571.20<br>511.24, 553.30<br>732.32, 678.34 | 749.20679<br>(-2.6) | 689.19, 629.24<br>569.26, 671.24<br>509.38, 611.31<br>647.28, 731.25<br>629.85, 587.18 |
| 161. |  <p><b>Chermesinone A</b><br/>C<sub>17</sub>H<sub>22</sub>O<sub>4</sub></p>                                        | 4.15 | 222,<br>354                 | 291.15845<br>(-2.2) | 189.22, 245.17<br>273.20, 231.24<br>201.20, 145.13<br>255.17, 161.19<br>174.20, 175.21 | ND                  | ND                                                                                     |
| 162. |  <p><b>Chermesinone B</b><br/>C<sub>18</sub>H<sub>20</sub>O<sub>5</sub></p>                                       | 4.50 | 222,<br>354                 | 317.13794<br>(-1.3) | 233.08, 215.08<br>187.07, 159.08<br>245.13, 273.12<br>205.14, 189.11<br>281.14, 188.12 | 315.12302<br>(-2.5) | 273.15, 229.01<br>271.13, 253.06<br>189.00, 210.98<br>231.11, 187.08<br>243.15, 225.08 |
| 163. |  <p><b>5'-formyl-2'-hydroxyl-4'-methoxy-(E,E)-sorbophenone</b><br/>C<sub>14</sub>H<sub>14</sub>O<sub>4</sub></p> | 5.33 | 225,<br>266,<br>311,<br>343 | 247.09599<br>(-2.0) | 178.95, 197.03<br>190.97, 218.97<br>229.03, 201.06<br>150.93, 190.00<br>164.98, 177.07 | 245.08153<br>(-1.6) | 227.09, 230.05<br>211.96, 183.95<br>150.02, 245.06<br>163.93, 213.00<br>202.07, 200.90 |

|      |                                                                                                                                                                                                                |      |                             |                     |                                                                                        |                     |                                                                                        |
|------|----------------------------------------------------------------------------------------------------------------------------------------------------------------------------------------------------------------|------|-----------------------------|---------------------|----------------------------------------------------------------------------------------|---------------------|----------------------------------------------------------------------------------------|
| 164. | 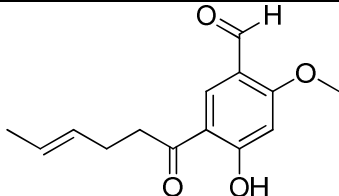 <p><b>5'-Formyl-2'-hydroxy-4'-methoxy-(E)-4-hexenophenone</b><br/>C<sub>14</sub>H<sub>16</sub>O<sub>4</sub></p>               | 5.48 | 253,<br>282,<br>322         | 249.11192<br>(-0.9) | 178.88, 231.02<br>221.11, 152.94<br>206.95, 164.93<br>203.07, 193.08<br>176.97, 175.05 | 247.09705<br>(-2.2) | 163.81, 247.07<br>177.88, 217.12<br>188.97, 231.00<br>149.94, 177.14<br>202.98, 232.04 |
| 165. |  <p><b>1-(2'-hydroxy-4'-methoxy-5'-methylphenyl)-2,4-E,E-hexadien-1-one</b><br/>C<sub>14</sub>H<sub>16</sub>O<sub>3</sub></p> | 6.16 | 234,<br>310,<br>357         | 233.11711<br>(-0.5) | 214.99, 164.97<br>205.05, 191.09<br>151.01, 187.01<br>176.99, 204.12<br>201.12, 233.09 | 231.10251<br>(-0.7) | 215.97, 197.94<br>213.00, 203.15<br>231.08, 175.01<br>150.00, 137.03<br>201.02, 184.94 |
| 166. | 01021-11-2*                                                                                                                                                                                                    | 5.48 | 243,<br>277,<br>314         | 279.12302<br>(+1.1) | 247.02, 208.94<br>235.08, 183.06<br>229.12, 150.91<br>261.17, 217.01<br>204.96, 193.11 | 277.10773<br>(-1.5) | 277.14, 193.92<br>192.84, 247.06<br>219.06, 179.85<br>261.02, 262.21<br>206.98, 163.95 |
| 167. |  <p><b>1-(2'-hydroxy-4'-methoxy-5'-hydroxymethylphenyl)-E-4-hexen-1-one</b><br/>C<sub>14</sub>H<sub>18</sub>O<sub>4</sub></p> | 4.64 | 233,<br>275,<br>319         | 251.12767<br>(-0.5) | 180.97, 233.16<br>215.09, 221.09<br>158.96, 186.99<br>136.99, 205.08<br>177.06, 203.02 | 249.11308<br>(-0.6) | 231.05, 216.06<br>248.95, 135.05<br>213.04, 176.99<br>188.11, 217.09<br>233.03, 201.01 |
| 168. | 01021-2-7*                                                                                                                                                                                                     | 4.44 | 230,<br>311,<br>350         | 249.11215<br>(+0.1) | 231.05, 180.93<br>219.15, 207.08<br>203.00, 200.95<br>204.08, 213.07<br>191.07, 174.97 | 247.09738<br>(-0.8) | 163.96, 232.01<br>247.19, 199.03<br>229.11, 178.03<br>214.03, 217.06<br>200.94, 230.92 |
| 169. | 01021-12-1*                                                                                                                                                                                                    | 4.43 | 223,<br>250,<br>314,<br>335 | 263.09131<br>(-0.3) | 245.05, 195.04<br>204.07, 177.02<br>187.00, 191.12<br>188.95, 219.11<br>217.00, 175.99 | 261.07651<br>(-1.3) | 188.99, 217.02<br>187.98, 199.06<br>171.06, 187.31<br>173.02, 202.11<br>246.08, 168.89 |

|      |                                                                                                                                                                                                                           |      |                                     |                     |                                                                                        |                     |                                                                                        |
|------|---------------------------------------------------------------------------------------------------------------------------------------------------------------------------------------------------------------------------|------|-------------------------------------|---------------------|----------------------------------------------------------------------------------------|---------------------|----------------------------------------------------------------------------------------|
| 170. | 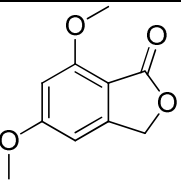 <p><b>5,7-dimethoxy-1(3H)-isobenzofuranone</b><br/> <b>5,7-Dimethoxyphthalide</b><br/> <math>C_{10}H_{10}O_4</math><br/> 01021-95-1</p>  | 2.50 | 217,<br>258,<br>291                 | 195.06467<br>(-2.6) | 194.99, 134.90<br>149.03, 139.02<br>165.01, 162.99<br>145.00, 119.01<br>120.91, 90.90  | 193.05014<br>(-2.6) | 177.88, 192.84<br>148.96, 149.89<br>162.91, 146.91<br>165.01, 133.78<br>175.02, 134.88 |
| 171. |  <p><b>4,6-Dimethoxy-1(3H)-isobenzofuranone</b><br/> <b>4,6-Dimethoxyphthalide</b><br/> <math>C_{10}H_{10}O_4</math><br/> 01021-95-3</p> | 3.53 | 197,<br>222,<br>250,<br>308         | 195.06468<br>(-2.6) | 194.99, 134.89<br>148.92, 162.92<br>144.87, 118.93<br>177.01, 166.97<br>150.99, 138.96 | 193.05008<br>(-2.9) | 148.93, 193.01<br>146.85, 177.95<br>167.00, 121.07<br>133.91, 134.93<br>165.19, 174.90 |
| 172. | 01021-127-2*                                                                                                                                                                                                              | 6.40 | 193,<br>219,<br>232,<br>276,<br>326 | 235.13222<br>(-2.8) | 165.06, 235.04<br>217.04, 151.01<br>193.06, 189.03<br>191.11, 179.09<br>174.96, 177.03 | 233.11761<br>(-3.0) | 233.01, 189.14<br>149.96, 218.20<br>136.96, 178.03<br>174.85, 217.47<br>203.20, 164.07 |

ND: Not Detected

\*New compound, not published yet
